# Supplementary material
Source: Research Square preprint supplement (doi:10.21203/rs.3.rs-9679135/v1)
Supplement: Supplementary file 2 [file f3689afd90e3c203adbe05f6.pdf]

**Supplementary Table 1.** List of primers used for real-time PCR and shRNA.

| Genes         | Sequences (5' to 3')                                        | Product size (bp) |
|---------------|-------------------------------------------------------------|-------------------|
| RPS18         | 5'-GCAGAATCCACGCCAGTACAAG-3'<br>5'-GCTTGTGTCCAGACCATTGGC-3' | 107               |
| TNF- $\alpha$ | 5'-CAGAGGGCCTGTACCTCATC-3'<br>5'-GGAAGACCCCTCCAGATAG-3'     | 114               |
| CXCL9         | 5'-AAAGGGTCGCTGTTCTGCA-3'<br>5'-TCAATTTCTCGCAGGAAGGGCT-3'   | 105               |
| IL-10         | 5'-GATCCAGTTTTACCTGGAGGAG-3'<br>5'-CCTGAGGGTCTCAGGTTCTC-3'  | 103               |
| CD206         | 5'-CGAGGAAGAGGTTTCGGTTCACC-3'<br>5'-GCAATCCCCGTTCTCATGGC-3' | 84                |
| TREM2         | 5'-CTGGTGGAGGTGCTGGCAGA-3'<br>5'-AAGCTCTCAGACTCCCCGGG-3'    | 77                |

  

| Genes      | Sequences             |
|------------|-----------------------|
| shScramble | CCTAAGGTTAAGTCGCCCTCG |
| shTrem2    | GAGCCTCTTGAAGGAGAAAT  |

**Supplementary Table 2.** Differentially expressed protein between CAR-HER2 shScramble and CAR-HER2 shTREM2

| Class | Feature | Overexpression | Score           |
|-------|---------|----------------|-----------------|
| CAR+  | Scr     | YWHAZ          | 313252.734<br>6 |
| CAR+  | Scr     | IL1B           | 296980.504<br>8 |
| CAR+  | Scr     | AHSG           | 271470.661<br>8 |
| CAR+  | Scr     | PLAU           | 129931.729<br>1 |
| CAR+  | Scr     | NQO1           | 118934.987<br>1 |
| CAR+  | Scr     | MYH9           | 107188.666<br>7 |
| CAR+  | Scr     | C5AR1          | 99203.835       |

|      |     |           |            |
|------|-----|-----------|------------|
| CAR+ | Scr | HBB;HBD   | 97122.6258 |
| CAR+ | Scr | ARF1;ARF3 | 89852.5813 |
| CAR+ | Scr | CCL20     | 86475.4678 |
| CAR+ | Scr | SRC       | 72743.6542 |
| CAR+ | Scr | PLIN2     | 67070.6318 |
| CAR+ | Scr | CD44      | 59616.5243 |
| CAR+ | Scr | CHI3L1    | 59164.1346 |
| CAR+ | Scr | YWHAG     | 55956.2469 |
| CAR+ | Scr | ALCAM     | 55914.5054 |
| CAR+ | Scr | LGALS3    | 49456.3774 |
| CAR+ | Scr | KCTD12    | 42974.572  |
| CAR+ | Scr | SLAMF8    | 41958.8306 |
| CAR+ | Scr | EIF5A     | 40794.5295 |
| CAR+ | Scr | TMED5     | 40356.9454 |
| CAR+ | Scr | SSR4      | 39258.0734 |
| CAR+ | Scr | METTL9    | 38071.0514 |
| CAR+ | Scr | TIMP1     | 37879.3847 |
| CAR+ | Scr | MMP9      | 35985.6954 |
| CAR+ | Scr | FN1       | 35359.4319 |
| CAR+ | Scr | GNAI3     | 34552.6755 |
| CAR+ | Scr | KYNU      | 33740.594  |
| CAR+ | Scr | ASPH      | 33260.2539 |
| CAR+ | Scr | S100P     | 32208.2842 |
| CAR+ | Scr | TGM2      | 31439.4969 |
| CAR+ | Scr | RPS12     | 28674.9039 |
| CAR+ | Scr | FCAR      | 28168.0987 |
| CAR+ | Scr | H1-0      | 27311.0543 |
| CAR+ | Scr | NPC2      | 26134.1811 |
| CAR+ | Scr | SELENOT   | 25533.879  |
| CAR+ | Scr | HK2       | 25304.9321 |
| CAR+ | Scr | SLC2A1    | 25269.1207 |

|      |     |          |            |
|------|-----|----------|------------|
| CAR+ | Scr | CTSL     | 24958.6392 |
| CAR+ | Scr | GCLC     | 24001.0133 |
| CAR+ | Scr | TYROBP   | 21977.6848 |
| CAR+ | Scr | PPIF     | 21972.8312 |
| CAR+ | Scr | PGGT1B   | 21767.7405 |
| CAR+ | Scr | SLC4A7   | 21256.6188 |
| CAR+ | Scr | NPTN     | 21201.1536 |
| CAR+ | Scr | PLEK     | 20533.6034 |
| CAR+ | Scr | STK10    | 20256.4155 |
| CAR+ | Scr | TRPV2    | 20114.7231 |
| CAR+ | Scr | RAB31    | 20101.0949 |
| CAR+ | Scr | MTSS1    | 19282.7649 |
| CAR+ | Scr | SBDS     | 19000.7715 |
| CAR+ | Scr | PLD3     | 18591.1477 |
| CAR+ | Scr | PSAT1    | 18511.9466 |
| CAR+ | Scr | SQLE     | 18390.854  |
| CAR+ | Scr | ITGA2    | 18059.1289 |
| CAR+ | Scr | SPP1     | 17838.2412 |
| CAR+ | Scr | HK1      | 16999.3351 |
| CAR+ | Scr | KARS1    | 15659.7743 |
| CAR+ | Scr | GSTM3    | 15355.0166 |
| CAR+ | Scr | EIF6     | 14064.7999 |
| CAR+ | Scr | RAB18    | 13635.2084 |
| CAR+ | Scr | SEC61G   | 13613.2568 |
| CAR+ | Scr | APBB1IP  | 13543.4702 |
| CAR+ | Scr | PSMD4    | 13465.1626 |
| CAR+ | Scr | EFL1     | 13437.7439 |
| CAR+ | Scr | NRP1     | 13215.9281 |
| CAR+ | Scr | APOH     | 12949.7211 |
| CAR+ | Scr | SERPINF2 | 12845.1576 |
| CAR+ | Scr | ME1      | 12714.3922 |

|      |     |          |            |
|------|-----|----------|------------|
| CAR+ | Scr | IDI1     | 12570.6882 |
| CAR+ | Scr | ACSL1    | 12524.8806 |
| CAR+ | Scr | SH3PXD2B | 12159.8127 |
| CAR+ | Scr | BCAT1    | 11838.5061 |
| CAR+ | Scr | TLR2     | 11812.0033 |
| CAR+ | Scr | IGF2R    | 11444.3417 |
| CAR+ | Scr | EVL      | 11441.2041 |
| CAR+ | Scr | BID      | 11435.1433 |
| CAR+ | Scr | GK       | 11409.2895 |
| CAR+ | Scr | IL1RN    | 11189.8701 |
| CAR+ | Scr | HMOX1    | 11020.1467 |
| CAR+ | Scr | THBS1    | 10933.9847 |
| CAR+ | Scr | ACSL5    | 10907.3458 |
| CAR+ | Scr | AHCYL1   | 10882.3558 |
| CAR+ | Scr | GGA1     | 10616.1072 |
| CAR+ | Scr | OXR1     | 10608.7964 |
| CAR+ | Scr | NME3     | 10219.6906 |
| CAR+ | Scr | RGS10    | 9896.7736  |
| CAR+ | Scr | SERPIND1 | 9610.9535  |
| CAR+ | Scr | STXBP3   | 9568.9216  |
| CAR+ | Scr | PPFIBP1  | 9540.2028  |
| CAR+ | Scr | LACC1    | 9170.8578  |
| CAR+ | Scr | FNDC3A   | 9121.1079  |
| CAR+ | Scr | PTPN1    | 9046.5165  |
| CAR+ | Scr | STX4     | 9010.7223  |
| CAR+ | Scr | BLVRB    | 8969.034   |
| CAR+ | Scr | CHP1     | 8951.6531  |
| CAR+ | Scr | ITGB3    | 8940.2137  |
| CAR+ | Scr | TWF1     | 8901.861   |
| CAR+ | Scr | MBP      | 8712.0315  |
| CAR+ | Scr | MGLL     | 8582.1181  |

|      |     |             |           |
|------|-----|-------------|-----------|
| CAR+ | Scr | NCF2        | 8145.6718 |
| CAR+ | Scr | ADSS2       | 8022.8013 |
| CAR+ | Scr | ENO2        | 7763.2183 |
| CAR+ | Scr | ADAM9       | 7730.0347 |
| CAR+ | Scr | STK38L      | 7619.3322 |
| CAR+ | Scr | CLEC3B      | 7445.4264 |
| CAR+ | Scr | RAB21       | 7329.4072 |
| CAR+ | Scr | PTPRJ       | 7187.1096 |
| CAR+ | Scr | PSMC1       | 6906.0681 |
| CAR+ | Scr | CKAP4       | 6888.8558 |
| CAR+ | Scr | NOMO1       | 6840.7727 |
| CAR+ | Scr | C4A         | 6767.5011 |
| CAR+ | Scr | THBD        | 6604.4161 |
| CAR+ | Scr | RABGGTB     | 6494.482  |
| CAR+ | Scr | NUMB        | 6271.3904 |
| CAR+ | Scr | MOB1A;MOB1B | 6242.5706 |
| CAR+ | Scr | ENG         | 6219.1995 |
| CAR+ | Scr | CARS1       | 6157.1391 |
| CAR+ | Scr | DNAJC7      | 6028.3299 |
| CAR+ | Scr | RHBDF2      | 6019.6861 |
| CAR+ | Scr | QSOX1       | 6015.4081 |
| CAR+ | Scr | APOM        | 6009.6448 |
| CAR+ | Scr | CD36        | 5983.0096 |
| CAR+ | Scr | NT5C2       | 5908.7235 |
| CAR+ | Scr | F2          | 5772.0088 |
| CAR+ | Scr | MICAL2      | 5728.5797 |
| CAR+ | Scr | TDO2        | 5467.3161 |
| CAR+ | Scr | PLCB2       | 5390.5696 |
| CAR+ | Scr | EML4        | 5371.4903 |
| CAR+ | Scr | AK4         | 5335.1219 |
| CAR+ | Scr | DHRS7       | 5268.4271 |

|      |     |         |           |
|------|-----|---------|-----------|
| CAR+ | Scr | LAT     | 5238.1186 |
| CAR+ | Scr | EPB41L3 | 5168.4484 |
| CAR+ | Scr | TMEM63B | 5148.661  |
| CAR+ | Scr | GSDME   | 4985.9755 |
| CAR+ | Scr | CCDC124 | 4927.585  |
| CAR+ | Scr | SIRPA   | 4881.6264 |
| CAR+ | Scr | GPAT3   | 4777.6844 |
| CAR+ | Scr | NRAS    | 4723.2925 |
| CAR+ | Scr | IREB2   | 4592.1411 |
| CAR+ | Scr | ENPP4   | 4488.389  |
| CAR+ | Scr | ITGAM   | 4451.8751 |
| CAR+ | Scr | SLC1A5  | 4274.9247 |
| CAR+ | Scr | CHMP7   | 4224.6842 |
| CAR+ | Scr | PAPSS2  | 4153.0728 |
| CAR+ | Scr | COA7    | 3761.0281 |
| CAR+ | Scr | ARPC1A  | 3600.9291 |
| CAR+ | Scr | RBM47   | 3597.4069 |
| CAR+ | Scr | RNF181  | 3505.6523 |
| CAR+ | Scr | SQSTM1  | 3496.9097 |
| CAR+ | Scr | TNIK    | 3471.4414 |
| CAR+ | Scr | IRF2BPL | 3362.0577 |
| CAR+ | Scr | FGR     | 3349.612  |
| CAR+ | Scr | FAM107B | 3343.374  |
| CAR+ | Scr | DKC1    | 3276.0865 |
| CAR+ | Scr | FBP1    | 3274.998  |
| CAR+ | Scr | PEX19   | 3264.3289 |
| CAR+ | Scr | STEAP1  | 3245.8263 |
| CAR+ | Scr | SLC15A3 | 3215.9958 |
| CAR+ | Scr | BET1    | 3214.66   |
| CAR+ | Scr | SORT1   | 3188.7247 |
| CAR+ | Scr | STX7    | 3183.1831 |

|      |     |         |           |
|------|-----|---------|-----------|
| CAR+ | Scr | TBXAS1  | 3170.8389 |
| CAR+ | Scr | ITGA4   | 3125.6527 |
| CAR+ | Scr | ATP13A3 | 3063.3402 |
| CAR+ | Scr | SLC2A13 | 3010.8533 |
| CAR+ | Scr | NAPG    | 2991.3434 |
| CAR+ | Scr | NAA10   | 2975.4846 |
| CAR+ | Scr | DOK3    | 2957.3799 |
| CAR+ | Scr | ARSB    | 2853.4565 |
| CAR+ | Scr | MPP1    | 2849.2997 |
| CAR+ | Scr | FCHO2   | 2665.5335 |
| CAR+ | Scr | BCL2L1  | 2645.8772 |
| CAR+ | Scr | PHPT1   | 2595.5859 |
| CAR+ | Scr | UNC93B1 | 2550.0133 |
| CAR+ | Scr | TMEM87B | 2528.4383 |
| CAR+ | Scr | FAM20C  | 2518.0665 |
| CAR+ | Scr | PANX1   | 2491.6495 |
| CAR+ | Scr | CD40    | 2398.3775 |
| CAR+ | Scr | PREX1   | 2327.9167 |
| CAR+ | Scr | RNF214  | 2202.1596 |
| CAR+ | Scr | GOPC    | 2193.0534 |
| CAR+ | Scr | PLEKHF1 | 1993.5716 |
| CAR+ | Scr | IRF5    | 1987.0873 |
| CAR+ | Scr | ANTXR2  | 1961.2499 |
| CAR+ | Scr | ATL2    | 1824.9975 |
| CAR+ | Scr | SEL1L   | 1716.2638 |
| CAR+ | Scr | COMMD5  | 1700.9479 |
| CAR+ | Scr | GTSF1   | 1666.3642 |
| CAR+ | Scr | USP47   | 1658.1548 |
| CAR+ | Scr | ZNF330  | 1629.6166 |
| CAR+ | Scr | YIPF1   | 1458.7805 |
| CAR+ | Scr | TBC1D23 | 1426.2882 |

|      |     |          |             |
|------|-----|----------|-------------|
| CAR+ | Scr | ALG2     | 1362.0788   |
| CAR+ | Scr | UBQLN2   | 1272.2348   |
| CAR+ | Scr | RAB2B    | 1131.2873   |
| CAR+ | Scr | FAM114A2 | 1047.8965   |
| CAR+ | Scr | PPP1R11  | 1032.6976   |
| CAR+ | Scr | TMEM41B  | 838.5128    |
| CAR+ | Scr | ASB1     | 795.6009    |
| CAR+ | Scr | AP5B1    | 704.7595    |
| CAR+ | Scr | SH3BP5L  | 540.3545    |
| CAR+ | Scr | S100B    | 452.7495    |
| CAR+ | Scr | RRM2B    | 452.4395    |
| CAR+ | T2  | PRDX6    | 264397.2868 |
| CAR+ | T2  | MCM7     | 198613.7579 |
| CAR+ | T2  | STMN1    | 101162.7717 |
| CAR+ | T2  | ARHGDIB  | 76577.7809  |
| CAR+ | T2  | MCM2     | 66404.2849  |
| CAR+ | T2  | HLA-C    | 55194.381   |
| CAR+ | T2  | RBBP7    | 53055.0154  |
| CAR+ | T2  | ARHGAP1  | 35940.4196  |
| CAR+ | T2  | PCNA     | 29489.6457  |
| CAR+ | T2  | CPNE2    | 29137.6698  |
| CAR+ | T2  | MCM4     | 27965.6845  |
| CAR+ | T2  | SCIN     | 27599.844   |
| CAR+ | T2  | FEN1     | 25721.8539  |
| CAR+ | T2  | SMARCC2  | 23728.282   |
| CAR+ | T2  | MCM3     | 23125.4446  |
| CAR+ | T2  | BUB3     | 22646.6891  |
| CAR+ | T2  | MCM6     | 20784.6383  |
| CAR+ | T2  | HAT1     | 19549.0056  |
| CAR+ | T2  | CNN2     | 17247.7994  |

|      |    |           |            |
|------|----|-----------|------------|
| CAR+ | T2 | UQCRFS1   | 17088.4016 |
| CAR+ | T2 | SERPINH1  | 16125.596  |
| CAR+ | T2 | RO60      | 16057.5052 |
| CAR+ | T2 | HLA-H     | 15561.5762 |
| CAR+ | T2 | TMPO      | 14966.9263 |
| CAR+ | T2 | TK1       | 14757.5341 |
| CAR+ | T2 | KPNA2     | 14688.0068 |
| CAR+ | T2 | TRIP13    | 14468.4056 |
| CAR+ | T2 | NDUFB10   | 14066.7334 |
| CAR+ | T2 | SMC2      | 13767.0638 |
| CAR+ | T2 | NDUFA13   | 13682.8655 |
| CAR+ | T2 | SERPINB10 | 13444.2808 |
| CAR+ | T2 | HDAC1     | 13191.2945 |
| CAR+ | T2 | API5      | 12875.3018 |
| CAR+ | T2 | MTA2      | 12483.9234 |
| CAR+ | T2 | CDK1      | 11890.1995 |
| CAR+ | T2 | MCM5      | 11822.3028 |
| CAR+ | T2 | RAD21     | 11736.1945 |
| CAR+ | T2 | CDK2      | 11685.4556 |
| CAR+ | T2 | SDHB      | 11610.5152 |
| CAR+ | T2 | DCK       | 10834.4189 |
| CAR+ | T2 | ACAA2     | 10456.3732 |
| CAR+ | T2 | UQCRQ     | 9964.7394  |
| CAR+ | T2 | DHFR      | 9943.4501  |
| CAR+ | T2 | NDUFS1    | 9249.8883  |
| CAR+ | T2 | IRAG2     | 9036.3921  |
| CAR+ | T2 | ACP3      | 8978.6641  |
| CAR+ | T2 | PRPS2     | 8862.219   |
| CAR+ | T2 | RPA1      | 8760.7183  |
| CAR+ | T2 | TTLL12    | 8584.6791  |
| CAR+ | T2 | BACC1     | 8168.4094  |

|      |    |          |           |
|------|----|----------|-----------|
| CAR+ | T2 | XPO1     | 8093.9122 |
| CAR+ | T2 | STAT1    | 8016.7842 |
| CAR+ | T2 | HEXA     | 7897.5985 |
| CAR+ | T2 | RANGAP1  | 7829.8501 |
| CAR+ | T2 | NDUFB4   | 7808.0775 |
| CAR+ | T2 | CD109    | 7323.5294 |
| CAR+ | T2 | DTYMK    | 7062.9456 |
| CAR+ | T2 | UBA7     | 6896.5296 |
| CAR+ | T2 | GLMN     | 6530.1159 |
| CAR+ | T2 | CBFB     | 6495.2794 |
| CAR+ | T2 | TMED4    | 6417.335  |
| CAR+ | T2 | CRTAP    | 6329.8364 |
| CAR+ | T2 | UBA2     | 5690.9505 |
| CAR+ | T2 | NDUFA9   | 5617.9642 |
| CAR+ | T2 | NDUFA11  | 5418.1338 |
| CAR+ | T2 | KIAA0930 | 5399.0506 |
| CAR+ | T2 | BDH1     | 5288.6813 |
| CAR+ | T2 | NDUFB8   | 5244.6251 |
| CAR+ | T2 | NDUFA12  | 5180.5119 |
| CAR+ | T2 | NDUFA5   | 5139.7013 |
| CAR+ | T2 | RFC5     | 5048.418  |
| CAR+ | T2 | MRC2     | 5028.7487 |
| CAR+ | T2 | BST2     | 4998.4558 |
| CAR+ | T2 | SDHA     | 4969.9895 |
| CAR+ | T2 | FKBP5    | 4851.1573 |
| CAR+ | T2 | SYK      | 4829.8939 |
| CAR+ | T2 | ACY1     | 4744.9173 |
| CAR+ | T2 | NUMA1    | 4719.2918 |
| CAR+ | T2 | RING1    | 4652.6488 |
| CAR+ | T2 | ADAM10   | 4347.4834 |
| CAR+ | T2 | MSH2     | 4278.2314 |

|      |    |          |           |
|------|----|----------|-----------|
| CAR+ | T2 | GYG1     | 4245.6735 |
| CAR+ | T2 | FLAD1    | 4096.1136 |
| CAR+ | T2 | NUDT19   | 4060.6828 |
| CAR+ | T2 | SNX4     | 4057.0555 |
| CAR+ | T2 | RFC2     | 4041.791  |
| CAR+ | T2 | MT-ND3   | 3912.2026 |
| CAR+ | T2 | PGPEP1   | 3585.1784 |
| CAR+ | T2 | CYB5R2   | 3420.288  |
| CAR+ | T2 | DERA     | 3363.1761 |
| CAR+ | T2 | NDUFC2   | 3279.4562 |
| CAR+ | T2 | ERMP1    | 3227.7291 |
| CAR+ | T2 | RFC4     | 3207.7331 |
| CAR+ | T2 | POLDIP3  | 3180.1218 |
| CAR+ | T2 | PRPSAP1  | 3117.5466 |
| CAR+ | T2 | MT-ND2   | 3104.2795 |
| CAR+ | T2 | ISG20    | 3096.7919 |
| CAR+ | T2 | UBE2S    | 3052.4737 |
| CAR+ | T2 | GNAI1    | 3020.1279 |
| CAR+ | T2 | PLD4     | 3015.1376 |
| CAR+ | T2 | APOBEC3C | 2860.6807 |
| CAR+ | T2 | MCCC2    | 2789.2749 |
| CAR+ | T2 | TKFC     | 2758.7331 |
| CAR+ | T2 | GLIPR2   | 2735.607  |
| CAR+ | T2 | ILKAP    | 2730.6745 |
| CAR+ | T2 | NUDT1    | 2587.3122 |
| CAR+ | T2 | TPBG     | 2583.0365 |
| CAR+ | T2 | DAGLB    | 2565.3659 |
| CAR+ | T2 | FKBP9    | 2370.5491 |
| CAR+ | T2 | GABPA    | 2331.5067 |
| CAR+ | T2 | NELFA    | 2267.3569 |
| CAR+ | T2 | FECH     | 2177.4955 |

|      |    |          |           |
|------|----|----------|-----------|
| CAR+ | T2 | RNASEH2A | 2108.6913 |
| CAR+ | T2 | LGALS3BP | 1924.8713 |
| CAR+ | T2 | PACS1    | 1873.635  |
| CAR+ | T2 | METTL26  | 1834.858  |
| CAR+ | T2 | PPAT     | 1730.805  |
| CAR+ | T2 | MED1     | 1670.2821 |
| CAR+ | T2 | MED25    | 1536.8946 |
| CAR+ | T2 | CLYBL    | 1325.8427 |
| CAR+ | T2 | GTF3C4   | 1117.4545 |
| CAR+ | T2 | ARHGAP15 | 1112.6647 |
| CAR+ | T2 | NR2C2AP  | 1051.9864 |
| CAR+ | T2 | DPH2     | 952.7598  |
| CAR+ | T2 | ADPRH    | 605.1735  |
| CAR+ | T2 | DNAAF10  | 418.4819  |

**Supplementary Table 3.** Differentially expressed protein between CAR-HER2 shScramble and CAR-HER2 shTREM2 after treatment with IFN $\gamma$  or IL4/IL10.

| Class    | Feature | Overexpression Score |
|----------|---------|----------------------|
| CAR+ Scr | IL1B    | 284181.281           |
| CAR+ Scr | TAGLN2  | 124511.6516          |
| CAR+ Scr | PLAU    | 96301.3792           |
| CAR+ Scr | CCL20   | 89756.2802           |
| CAR+ Scr | HBB;HBD | 79514.1918           |
| CAR+ Scr | VAT1    | 57601.7333           |
| CAR+ Scr | LGALS3  | 43013.8355           |
| CAR+ Scr | ALCAM   | 35857.5878           |
| CAR+ Scr | METTL9  | 35594.4557           |
| CAR+ Scr | MMP9    | 34179.0464           |
| CAR+ Scr | FN1     | 33973.193            |
| CAR+ Scr | ITGB5   | 32348.2874           |

|          |        |            |
|----------|--------|------------|
| CAR+ Scr | PLIN2  | 32008.253  |
| CAR+ Scr | TIMP1  | 29273.9969 |
| CAR+ Scr | CD44   | 28315.7182 |
| CAR+ Scr | STIP1  | 27664.7038 |
| CAR+ Scr | CD9    | 21447.9068 |
| CAR+ Scr | ITGA5  | 21017.0782 |
| CAR+ Scr | S100P  | 20960.6919 |
| CAR+ Scr | PECAM1 | 20904.1157 |
| CAR+ Scr | ALDOC  | 20320.8613 |
| CAR+ Scr | ATP1B3 | 20114.6362 |
| CAR+ Scr | FCAR   | 18192.7344 |
| CAR+ Scr | NPTN   | 18060.5574 |
| CAR+ Scr | PLD3   | 17076.4029 |
| CAR+ Scr | CD14   | 16943.8373 |
| CAR+ Scr | NT5E   | 16872.7135 |
| CAR+ Scr | PGGT1B | 16868.7948 |
| CAR+ Scr | MTSS1  | 16824.093  |
| CAR+ Scr | SLC4A7 | 16681.1838 |
| CAR+ Scr | H1-0   | 16187.1842 |
| CAR+ Scr | SARS1  | 16120.7554 |
| CAR+ Scr | NPC2   | 15510.6762 |
| CAR+ Scr | KCTD12 | 14358.2144 |
| CAR+ Scr | SBDS   | 12719.221  |
| CAR+ Scr | BASP1  | 12563.0973 |
| CAR+ Scr | ITGA2  | 12122.6924 |
| CAR+ Scr | CYRIA  | 11659.2407 |
| CAR+ Scr | TYROBP | 11119.6303 |
| CAR+ Scr | PRDX5  | 10521.9103 |
| CAR+ Scr | PSAT1  | 9944.8293  |
| CAR+ Scr | THBS1  | 9828.1903  |
| CAR+ Scr | CTSS   | 9241.3821  |

|          |          |           |
|----------|----------|-----------|
| CAR+ Scr | SLC43A3  | 9009.9153 |
| CAR+ Scr | PLAUR    | 8966.8092 |
| CAR+ Scr | OXR1     | 8721.4693 |
| CAR+ Scr | PSMB6    | 8410.2232 |
| CAR+ Scr | SOD2     | 8350.0523 |
| CAR+ Scr | ME1      | 8322.5411 |
| CAR+ Scr | GLOD4    | 8236.2512 |
| CAR+ Scr | CHI3L1   | 7982.8536 |
| CAR+ Scr | NUMB     | 7306.6781 |
| CAR+ Scr | FKBP1A   | 7116.368  |
| CAR+ Scr | RGS10    | 6510.0881 |
| CAR+ Scr | BANF1    | 6501.574  |
| CAR+ Scr | NPL      | 6441.8445 |
| CAR+ Scr | TLR2     | 6402.3967 |
| CAR+ Scr | LACC1    | 6290.9362 |
| CAR+ Scr | SLC20A1  | 6241.9011 |
| CAR+ Scr | TIMP3    | 6217.8894 |
| CAR+ Scr | SLAMF8   | 6213.2128 |
| CAR+ Scr | MMP1     | 6114.6155 |
| CAR+ Scr | NRP1     | 6096.7723 |
| CAR+ Scr | RGCC     | 5983.2333 |
| CAR+ Scr | TWF1     | 5763.9042 |
| CAR+ Scr | ENG      | 5762.7292 |
| CAR+ Scr | BSG      | 5598.7106 |
| CAR+ Scr | MARCKSL1 | 5578.0435 |
| CAR+ Scr | ITGB3    | 5464.1887 |
| CAR+ Scr | ENO2     | 5364.9157 |
| CAR+ Scr | SLC37A2  | 5239.9359 |
| CAR+ Scr | CRYBB1   | 5222.8828 |
| CAR+ Scr | IL1RN    | 5213.328  |
| CAR+ Scr | MBP      | 5211.4063 |

|          |        |           |
|----------|--------|-----------|
| CAR+ Scr | MANF   | 5181.9438 |
| CAR+ Scr | YWHAQ  | 5111.5408 |
| CAR+ Scr | MGLL   | 5106.819  |
| CAR+ Scr | IGFBP3 | 4810.8694 |
| CAR+ Scr | NDRG2  | 4593.4817 |
| CAR+ Scr | THBD   | 4525.1139 |
| CAR+ Scr | BZW2   | 4487.7785 |
| CAR+ Scr | ADAM9  | 4472.9343 |
| CAR+ Scr | CD59   | 4294.1364 |
| CAR+ Scr | ERO1A  | 4106.9777 |
| CAR+ Scr | RDX    | 3809.3673 |
| CAR+ Scr | LAT    | 3713.5388 |
| CAR+ Scr | MYLK   | 3687.9883 |
| CAR+ Scr | TTC1   | 3641.4785 |
| CAR+ Scr | PTPRJ  | 3575.8152 |
| CAR+ Scr | EVL    | 3498.0408 |
| CAR+ Scr | POSTN  | 3493.5649 |
| CAR+ Scr | GSDME  | 3463.9911 |
| CAR+ Scr | CALU   | 3453.8126 |
| CAR+ Scr | SQSTM1 | 3437.2719 |
| CAR+ Scr | SPRY2  | 3431.1422 |
| CAR+ Scr | PLXNB2 | 3203.8541 |
| CAR+ Scr | RAI14  | 3171.5886 |
| CAR+ Scr | UBE2H  | 3136.1005 |
| CAR+ Scr | RCC2   | 3077.6294 |
| CAR+ Scr | SLC1A5 | 3058.8009 |
| CAR+ Scr | STEAP1 | 3003.131  |
| CAR+ Scr | GPC4   | 2970.4791 |
| CAR+ Scr | CD151  | 2967.6751 |
| CAR+ Scr | NSUN2  | 2946.1945 |
| CAR+ Scr | BTN2A1 | 2921.6524 |

|          |          |           |
|----------|----------|-----------|
| CAR+ Scr | QSOX1    | 2779.4503 |
| CAR+ Scr | COL7A1   | 2757.3931 |
| CAR+ Scr | IRF2BPL  | 2721.0909 |
| CAR+ Scr | COA7     | 2645.8627 |
| CAR+ Scr | GLIPR1   | 2594.0869 |
| CAR+ Scr | XRCC1    | 2569.3247 |
| CAR+ Scr | SPP1     | 2555.9416 |
| CAR+ Scr | PLBD2    | 2426.5545 |
| CAR+ Scr | SEPTIN11 | 2422.8012 |
| CAR+ Scr | CKAP4    | 2414.3292 |
| CAR+ Scr | SIRPA    | 2359.3813 |
| CAR+ Scr | SLC17A5  | 2359.2542 |
| CAR+ Scr | KIAA0930 | 2325.9832 |
| CAR+ Scr | BET1     | 2302.9547 |
| CAR+ Scr | EPB41L3  | 2288.2077 |
| CAR+ Scr | GRIPAP1  | 2222.7037 |
| CAR+ Scr | EIF4B    | 2185.1263 |
| CAR+ Scr | SPHK1    | 2182.5373 |
| CAR+ Scr | GTF2F2   | 2144.9323 |
| CAR+ Scr | MSR1     | 2051.8304 |
| CAR+ Scr | ADGRE2   | 2029.1502 |
| CAR+ Scr | AKR7A2   | 1966.5453 |
| CAR+ Scr | PDCD4    | 1905.7202 |
| CAR+ Scr | TNIK     | 1884.0258 |
| CAR+ Scr | SYAP1    | 1883.3032 |
| CAR+ Scr | P2RX4    | 1861.1661 |
| CAR+ Scr | MPP1     | 1795.726  |
| CAR+ Scr | LYRM4    | 1710.8701 |
| CAR+ Scr | TMEM120A | 1680.049  |
| CAR+ Scr | CTSC     | 1641.9419 |
| CAR+ Scr | ATP2B4   | 1626.2836 |

|          |         |           |
|----------|---------|-----------|
| CAR+ Scr | UNC93B1 | 1504.572  |
| CAR+ Scr | NHP2    | 1469.3084 |
| CAR+ Scr | OAT     | 1455.7319 |
| CAR+ Scr | CD37    | 1453.4818 |
| CAR+ Scr | KRTDAP  | 1415.4443 |
| CAR+ Scr | BCKDHA  | 1388.9496 |
| CAR+ Scr | PAG1    | 1263.7312 |
| CAR+ Scr | TANK    | 1246.7688 |
| CAR+ Scr | APIP    | 1200.5525 |
| CAR+ Scr | CASP10  | 1195.9584 |
| CAR+ Scr | STXBP1  | 1181.6129 |
| CAR+ Scr | DDAH2   | 1180.8252 |
| CAR+ Scr | SLC29A1 | 1157.9108 |
| CAR+ Scr | C2CD2L  | 1125.327  |
| CAR+ Scr | SDC2    | 1100.0785 |
| CAR+ Scr | CLIP1   | 1087.6172 |
| CAR+ Scr | SIL1    | 1060.9261 |
| CAR+ Scr | PRRC2A  | 999.3225  |
| CAR+ Scr | FCHO2   | 997.3974  |
| CAR+ Scr | DAB2    | 977.3664  |
| CAR+ Scr | CHMP6   | 973.8123  |
| CAR+ Scr | TDP1    | 967.0264  |
| CAR+ Scr | RELB    | 874.3521  |
| CAR+ Scr | COL6A1  | 826.6646  |
| CAR+ Scr | KANK2   | 793.095   |
| CAR+ Scr | CHMP1B  | 784.0582  |
| CAR+ Scr | CLN3    | 737.5531  |
| CAR+ Scr | SLC1A4  | 728.9576  |
| CAR+ Scr | ANTXR2  | 722.1593  |
| CAR+ Scr | CTSZ    | 713.9912  |
| CAR+ Scr | SLC8A1  | 704.4634  |

|          |            |             |
|----------|------------|-------------|
| CAR+ Scr | MORF4L1    | 655.3117    |
| CAR+ Scr | CARD6      | 618.8236    |
| CAR+ Scr | ZNF330     | 603.2197    |
| CAR+ Scr | UBL5       | 594.2986    |
| CAR+ Scr | MT-ND2     | 586.9855    |
| CAR+ Scr | KIDINS220  | 574.9658    |
| CAR+ Scr | WLS        | 561.5221    |
| CAR+ Scr | NDUFB3     | 544.0533    |
| CAR+ Scr | MTRF1L     | 521.4105    |
| CAR+ Scr | CSGALNACT2 | 479.878     |
| CAR+ Scr | NUDT16L1   | 472.4773    |
| CAR+ Scr | PYROXD1    | 444.5753    |
| CAR+ Scr | AIF1       | 430.3834    |
| CAR+ Scr | PTPN2      | 395.612     |
| CAR+ Scr | SCCPDH     | 387.9233    |
| CAR+ Scr | PPM1G      | 323.693     |
| CAR+ Scr | ITGAX      | 322.884     |
| CAR+ Scr | CNNM4      | 310.5554    |
| CAR+ Scr | MT-ND6     | 308.4893    |
| CAR+ Scr | CD70       | 308.2835    |
| CAR+ Scr | TMPO       | 212.0881    |
| CAR+ Scr | ZC3HC1     | 172.2873    |
| CAR+ Scr | AKR1B1     | 149.5742    |
| CAR+ Scr | ACADS      | 144.4587    |
| CAR+ Scr | RNF149     | 115.8972    |
| CAR+ Scr | WDR70      | 112.4622    |
| CAR+ Scr | BRD4       | 80.0025     |
| CAR+ Scr | MARCKS     | 59.0337     |
| CAR+ Scr | YAP1       | 29.4762     |
| CAR+ Scr | BTN3A3     | 17.0239     |
| CAR+ T2  | PRDX6      | 189654.1535 |

|         |         |             |
|---------|---------|-------------|
| CAR+ T2 | MCM7    | 174727.7433 |
| CAR+ T2 | PFN1    | 109964.6667 |
| CAR+ T2 | ARHGDIB | 75231.9809  |
| CAR+ T2 | STMN1   | 67321.5651  |
| CAR+ T2 | MCM2    | 56563.4823  |
| CAR+ T2 | PTGS1   | 51464.395   |
| CAR+ T2 | RBBP7   | 34855.1487  |
| CAR+ T2 | HLA-C   | 34294.981   |
| CAR+ T2 | LMNB1   | 32322.9     |
| CAR+ T2 | CPNE2   | 30910.9698  |
| CAR+ T2 | MYLK    | 27576.4584  |
| CAR+ T2 | SMARCC2 | 26610.482   |
| CAR+ T2 | ARHGAP1 | 25690.5663  |
| CAR+ T2 | MCM4    | 24255.7354  |
| CAR+ T2 | PCNA    | 23039.5057  |
| CAR+ T2 | YWHAQ   | 22701.8962  |
| CAR+ T2 | PRDX2   | 21789.1424  |
| CAR+ T2 | FEN1    | 21694.7072  |
| CAR+ T2 | RDX     | 19301.5633  |
| CAR+ T2 | SCIN    | 18753.6973  |
| CAR+ T2 | HAT1    | 18733.5583  |
| CAR+ T2 | MCM3    | 18665.5846  |
| CAR+ T2 | TMPO    | 18172.3996  |
| CAR+ T2 | MCM6    | 17820.3283  |
| CAR+ T2 | UBE2I   | 17263.392   |
| CAR+ T2 | CYRIA   | 16943.4767  |
| CAR+ T2 | BUB3    | 15797.8891  |
| CAR+ T2 | HLA-B   | 14759.1322  |
| CAR+ T2 | CDK6    | 13763.1171  |
| CAR+ T2 | KPNA2   | 13644.0715  |
| CAR+ T2 | BSG     | 13502.647   |

|         |          |            |
|---------|----------|------------|
| CAR+ T2 | RB1      | 12460.181  |
| CAR+ T2 | TK1      | 12233.7717 |
| CAR+ T2 | NDUFA13  | 11889.3569 |
| CAR+ T2 | TRIP13   | 11402.0507 |
| CAR+ T2 | UQCRFS1  | 11297.9883 |
| CAR+ T2 | ADK      | 11154.3606 |
| CAR+ T2 | PACSIN2  | 11015.1986 |
| CAR+ T2 | DUT      | 10874.209  |
| CAR+ T2 | RAD21    | 10749.2412 |
| CAR+ T2 | HEXB     | 10380.1257 |
| CAR+ T2 | UQCRQ    | 9912.411   |
| CAR+ T2 | CDK2     | 9885.9269  |
| CAR+ T2 | AKR7A2   | 9688.0295  |
| CAR+ T2 | CDK1     | 9662.5098  |
| CAR+ T2 | DHFR     | 9560.4754  |
| CAR+ T2 | MCM5     | 9146.7508  |
| CAR+ T2 | CD9      | 9101.9062  |
| CAR+ T2 | ACO2     | 9012.316   |
| CAR+ T2 | OXCT1    | 9003.742   |
| CAR+ T2 | KIAA0930 | 8804.844   |
| CAR+ T2 | SCCPDH   | 8498.5076  |
| CAR+ T2 | RPA1     | 8441.0323  |
| CAR+ T2 | DCK      | 8308.0575  |
| CAR+ T2 | ACP3     | 7906.7821  |
| CAR+ T2 | PPM1G    | 7879.9352  |
| CAR+ T2 | RBBP4    | 7811.2217  |
| CAR+ T2 | HLA-H    | 7766.1495  |
| CAR+ T2 | NES      | 7499.0618  |
| CAR+ T2 | SDHB     | 7396.5819  |
| CAR+ T2 | NDUFS1   | 7363.1623  |
| CAR+ T2 | GMPS     | 7115.0211  |

|         |         |           |
|---------|---------|-----------|
| CAR+ T2 | PRPS2   | 7079.701  |
| CAR+ T2 | NDUFS3  | 7071.6258 |
| CAR+ T2 | GGH     | 6505.8443 |
| CAR+ T2 | CD109   | 6269.3687 |
| CAR+ T2 | IRAG2   | 6101.4375 |
| CAR+ T2 | AKR1B1  | 5968.2489 |
| CAR+ T2 | KANK2   | 5920.5528 |
| CAR+ T2 | CNN2    | 5892.6394 |
| CAR+ T2 | SLC17A5 | 5846.609  |
| CAR+ T2 | GGCT    | 5551.8603 |
| CAR+ T2 | BACC1   | 5543.1828 |
| CAR+ T2 | SLC43A3 | 5357.2077 |
| CAR+ T2 | ACAA2   | 5322.8599 |
| CAR+ T2 | RRM2    | 5259.0302 |
| CAR+ T2 | RPA3    | 5199.7303 |
| CAR+ T2 | CNPY3   | 5156.816  |
| CAR+ T2 | RRM1    | 4930.8663 |
| CAR+ T2 | CBFB    | 4752.3994 |
| CAR+ T2 | NDUFA12 | 4718.7672 |
| CAR+ T2 | NDUFB8  | 4688.8385 |
| CAR+ T2 | NDUFA11 | 4682.5844 |
| CAR+ T2 | MRC2    | 4628.7107 |
| CAR+ T2 | NDUFA9  | 4438.3891 |
| CAR+ T2 | NCK2    | 4438.2555 |
| CAR+ T2 | UBA7    | 4371.8783 |
| CAR+ T2 | CKAP5   | 4341.0316 |
| CAR+ T2 | MT-ND2  | 4312.1209 |
| CAR+ T2 | NDUFA5  | 4304.2286 |
| CAR+ T2 | SET     | 4238.929  |
| CAR+ T2 | IVD     | 4226.3534 |
| CAR+ T2 | RFC5    | 4225.7657 |

|         |         |           |
|---------|---------|-----------|
| CAR+ T2 | RPA2    | 4117.5694 |
| CAR+ T2 | UCHL5   | 4116.4339 |
| CAR+ T2 | GLOD4   | 3980.264  |
| CAR+ T2 | MORF4L1 | 3910.4135 |
| CAR+ T2 | NDUFV1  | 3890.4974 |
| CAR+ T2 | MSH2    | 3811.6621 |
| CAR+ T2 | HDAC2   | 3789.0655 |
| CAR+ T2 | PDCD4   | 3785.3509 |
| CAR+ T2 | NUDT4   | 3690.7275 |
| CAR+ T2 | SNX4    | 3675.0121 |
| CAR+ T2 | CD151   | 3653.4966 |
| CAR+ T2 | RFC4    | 3563.2927 |
| CAR+ T2 | DCPS    | 3531.1582 |
| CAR+ T2 | NRGN    | 3480.3188 |
| CAR+ T2 | XRCC1   | 3471.5967 |
| CAR+ T2 | UBE2S   | 3465.8808 |
| CAR+ T2 | TMED4   | 3412.1683 |
| CAR+ T2 | ADAM10  | 3378.2554 |
| CAR+ T2 | SHMT1   | 3327.9483 |
| CAR+ T2 | GSTM4   | 3326.1068 |
| CAR+ T2 | DDAH2   | 3239.674  |
| CAR+ T2 | TXNDC5  | 3230.3657 |
| CAR+ T2 | ACY1    | 3158.6573 |
| CAR+ T2 | NUMA1   | 3154.8058 |
| CAR+ T2 | NXN     | 3072.3765 |
| CAR+ T2 | MT-ND3  | 2969.6152 |
| CAR+ T2 | LYRM4   | 2952.4756 |
| CAR+ T2 | GLIPR1  | 2830.4935 |
| CAR+ T2 | NELFCD  | 2812.8034 |
| CAR+ T2 | ACAD11  | 2802.9256 |
| CAR+ T2 | PCTP    | 2730.6258 |

|         |          |           |
|---------|----------|-----------|
| CAR+ T2 | NDUFB3   | 2577.8774 |
| CAR+ T2 | SERPINI1 | 2575.7295 |
| CAR+ T2 | SDHA     | 2509.2428 |
| CAR+ T2 | HIBCH    | 2505.549  |
| CAR+ T2 | NUDT19   | 2443.4695 |
| CAR+ T2 | NUDT1    | 2389.0788 |
| CAR+ T2 | PALD1    | 2385.417  |
| CAR+ T2 | RNASEH2A | 2248.9113 |
| CAR+ T2 | UBR7     | 2181.3611 |
| CAR+ T2 | IGFBP3   | 2162.2248 |
| CAR+ T2 | TKFC     | 2158.2111 |
| CAR+ T2 | HMGN2    | 2145.7001 |
| CAR+ T2 | SIAE     | 2144.3811 |
| CAR+ T2 | CD70     | 2113.7183 |
| CAR+ T2 | NELFA    | 2094.3682 |
| CAR+ T2 | GABPA    | 2050.2773 |
| CAR+ T2 | CYB5R2   | 2041.0    |
| CAR+ T2 | FOXK1    | 2008.271  |
| CAR+ T2 | CFAP20   | 1999.278  |
| CAR+ T2 | OSBPL3   | 1983.374  |
| CAR+ T2 | VRK1     | 1926.8541 |
| CAR+ T2 | PLXNB2   | 1923.7853 |
| CAR+ T2 | APOBEC3C | 1908.0514 |
| CAR+ T2 | DAGLB    | 1906.4265 |
| CAR+ T2 | SCLY     | 1904.232  |
| CAR+ T2 | CMTM3    | 1882.026  |
| CAR+ T2 | PRKACB   | 1875.571  |
| CAR+ T2 | ACADS    | 1863.7744 |
| CAR+ T2 | DBN1     | 1805.9514 |
| CAR+ T2 | NDUFS7   | 1785.6598 |
| CAR+ T2 | GNAI1    | 1765.864  |

|         |         |           |
|---------|---------|-----------|
| CAR+ T2 | SIL1    | 1733.4293 |
| CAR+ T2 | SLC29A1 | 1727.3758 |
| CAR+ T2 | CHMP1B  | 1698.549  |
| CAR+ T2 | SDSL    | 1671.9337 |
| CAR+ T2 | NDUFV3  | 1655.0502 |
| CAR+ T2 | MCCC2   | 1613.3549 |
| CAR+ T2 | FAHD2A  | 1568.1234 |
| CAR+ T2 | GAMT    | 1513.822  |
| CAR+ T2 | ARFIP1  | 1508.7948 |
| CAR+ T2 | FKBP9   | 1478.4885 |
| CAR+ T2 | SLC1A4  | 1442.6241 |
| CAR+ T2 | BRD4    | 1438.0328 |
| CAR+ T2 | MT-ND6  | 1406.6278 |
| CAR+ T2 | POLD2   | 1371.9875 |
| CAR+ T2 | RCC2    | 1364.4852 |
| CAR+ T2 | MED25   | 1232.0826 |
| CAR+ T2 | ZC3HC1  | 1213.3188 |
| CAR+ T2 | RSF1    | 1087.1079 |
| CAR+ T2 | PPAT    | 1084.0237 |
| CAR+ T2 | SDC2    | 1015.1277 |
| CAR+ T2 | NDUFA8  | 1008.9936 |
| CAR+ T2 | BCKDHA  | 991.6156  |
| CAR+ T2 | ITGAX   | 978.3399  |
| CAR+ T2 | PLBD2   | 961.3553  |
| CAR+ T2 | KNTC1   | 952.9897  |
| CAR+ T2 | NF2     | 950.1407  |
| CAR+ T2 | NCALD   | 884.4656  |
| CAR+ T2 | PACS1   | 852.7703  |
| CAR+ T2 | ALDH1B1 | 841.2376  |
| CAR+ T2 | ELAC2   | 836.8249  |
| CAR+ T2 | SLC8A1  | 817.3564  |

|              |          |             |
|--------------|----------|-------------|
| CAR+ T2      | MADD     | 805.1022    |
| CAR+ T2      | NR2C2AP  | 704.78      |
| CAR+ T2      | TDP1     | 703.8343    |
| CAR+ T2      | SEPTIN11 | 681.634     |
| CAR+ T2      | CD37     | 668.183     |
| CAR+ T2      | ELF1     | 632.4204    |
| CAR+ T2      | WDR70    | 621.541     |
| CAR+ T2      | CEP97    | 527.134     |
| CAR+ T2      | BIN1     | 513.1192    |
| CAR+ T2      | STXBP1   | 495.3963    |
| CAR+ T2      | DNASE1L1 | 445.6265    |
| CAR+ T2      | MELTF    | 411.0289    |
| CAR+ T2      | APMAP    | 280.309     |
| CAR+ T2      | PYCR2    | 278.5684    |
| CAR+ T2      | MFAP1    | 222.5597    |
| CAR+ T2      | BTN2A1   | 192.6301    |
| CAR+ T2      | HLA-F    | 89.2202     |
| CAR+ T2      | WLS      | 60.8617     |
| CAR+ T2      | UBXN4    | 25.1062     |
| CAR+ T2      | FAT1     | 17.7727     |
| CAR+ T2      | SCARB1   | 13.4271     |
| IFN CAR+ Scr | WARS1    | 920097.0172 |
| IFN CAR+ Scr | TAGLN2   | 128716.0516 |
| IFN CAR+ Scr | IL1B     | 102740.081  |
| IFN CAR+ Scr | STAT1    | 98150.3365  |
| IFN CAR+ Scr | TYMP     | 89417.9     |
| IFN CAR+ Scr | IFIT3    | 79543.7479  |
| IFN CAR+ Scr | SLAMF8   | 77102.1328  |
| IFN CAR+ Scr | PLEK     | 76483.0407  |
| IFN CAR+ Scr | CTSL     | 76365.9678  |
| IFN CAR+ Scr | LAP3     | 71457.8467  |

|              |         |            |
|--------------|---------|------------|
| IFN CAR+ Scr | GBP1    | 66281.6726 |
| IFN CAR+ Scr | KCTD12  | 65940.8944 |
| IFN CAR+ Scr | STIP1   | 50207.5038 |
| IFN CAR+ Scr | PSME1   | 49833.146  |
| IFN CAR+ Scr | CHI3L1  | 48998.4536 |
| IFN CAR+ Scr | GBP2    | 47094.7759 |
| IFN CAR+ Scr | S100A9  | 45102.7403 |
| IFN CAR+ Scr | CD14    | 43743.6373 |
| IFN CAR+ Scr | A2M     | 38826.9333 |
| IFN CAR+ Scr | PLIN2   | 34014.533  |
| IFN CAR+ Scr | CTSS    | 33583.2221 |
| IFN CAR+ Scr | HLA-B   | 32243.6616 |
| IFN CAR+ Scr | PLAUR   | 29969.6092 |
| IFN CAR+ Scr | HBB;HBD | 28134.5918 |
| IFN CAR+ Scr | GLUL    | 26801.7076 |
| IFN CAR+ Scr | HLA-E   | 25881.2925 |
| IFN CAR+ Scr | IFI35   | 25834.2584 |
| IFN CAR+ Scr | ALCAM   | 23736.1078 |
| IFN CAR+ Scr | ALDOC   | 23061.5413 |
| IFN CAR+ Scr | SPP1    | 22974.1016 |
| IFN CAR+ Scr | RNF181  | 22896.1758 |
| IFN CAR+ Scr | FCAR    | 20579.0144 |
| IFN CAR+ Scr | CRYBB1  | 19172.5628 |
| IFN CAR+ Scr | IFITM3  | 18762.9112 |
| IFN CAR+ Scr | CTSZ    | 18567.9512 |
| IFN CAR+ Scr | PLSCR1  | 17494.5423 |
| IFN CAR+ Scr | METTL9  | 16500.5829 |
| IFN CAR+ Scr | NT5E    | 16366.9135 |
| IFN CAR+ Scr | HLA-C   | 16193.7238 |
| IFN CAR+ Scr | TYROBP  | 15769.9503 |
| IFN CAR+ Scr | CCL20   | 15578.6002 |

|              |         |            |
|--------------|---------|------------|
| IFN CAR+ Scr | OAS1    | 15253.9935 |
| IFN CAR+ Scr | APOL2   | 14803.7505 |
| IFN CAR+ Scr | SOD2    | 14740.1323 |
| IFN CAR+ Scr | XIRP1   | 14220.5995 |
| IFN CAR+ Scr | ITGB5   | 12801.0874 |
| IFN CAR+ Scr | NMI     | 12543.2651 |
| IFN CAR+ Scr | TLR2    | 11943.8767 |
| IFN CAR+ Scr | CASP1   | 11292.162  |
| IFN CAR+ Scr | S100A8  | 11265.6494 |
| IFN CAR+ Scr | S100P   | 11121.5719 |
| IFN CAR+ Scr | BAK1    | 10996.6441 |
| IFN CAR+ Scr | PSAT1   | 10042.2693 |
| IFN CAR+ Scr | ITGA2   | 10012.8924 |
| IFN CAR+ Scr | ITGB7   | 9737.1315  |
| IFN CAR+ Scr | RGCC    | 9636.8733  |
| IFN CAR+ Scr | UBE2L6  | 9570.0439  |
| IFN CAR+ Scr | GALM    | 9339.0301  |
| IFN CAR+ Scr | ADGRE5  | 9197.7307  |
| IFN CAR+ Scr | MSR1    | 9028.7464  |
| IFN CAR+ Scr | MTSS1   | 8813.533   |
| IFN CAR+ Scr | CD36    | 8626.9446  |
| IFN CAR+ Scr | LGALS3  | 7859.8355  |
| IFN CAR+ Scr | EVL     | 7817.2408  |
| IFN CAR+ Scr | CD40    | 7692.9488  |
| IFN CAR+ Scr | FAM107B | 7627.6615  |
| IFN CAR+ Scr | CASP7   | 7163.13    |
| IFN CAR+ Scr | PTPRJ   | 7008.6552  |
| IFN CAR+ Scr | LACC1   | 6896.9362  |
| IFN CAR+ Scr | SLC2A3  | 6781.9255  |
| IFN CAR+ Scr | RCN1    | 6549.797   |
| IFN CAR+ Scr | NPC2    | 6306.2762  |

|              |          |           |
|--------------|----------|-----------|
| IFN CAR+ Scr | PARP14   | 6291.3004 |
| IFN CAR+ Scr | PRDX5    | 6216.0303 |
| IFN CAR+ Scr | VAT1     | 6211.7333 |
| IFN CAR+ Scr | AIF1     | 5857.6634 |
| IFN CAR+ Scr | IFIH1    | 5839.1364 |
| IFN CAR+ Scr | ACBD5    | 5591.0424 |
| IFN CAR+ Scr | MCL1     | 5370.837  |
| IFN CAR+ Scr | NRP1     | 5337.9323 |
| IFN CAR+ Scr | RGS10    | 5336.4081 |
| IFN CAR+ Scr | TIMP1    | 5236.7969 |
| IFN CAR+ Scr | P2RX4    | 5220.2061 |
| IFN CAR+ Scr | RNF149   | 5199.4812 |
| IFN CAR+ Scr | MLKL     | 5121.4381 |
| IFN CAR+ Scr | WIPF1    | 5103.1851 |
| IFN CAR+ Scr | LGALS3BP | 5035.1128 |
| IFN CAR+ Scr | CALU     | 4873.8126 |
| IFN CAR+ Scr | CTSC     | 4855.1419 |
| IFN CAR+ Scr | SAMD9L   | 4815.5239 |
| IFN CAR+ Scr | CASP3    | 4807.009  |
| IFN CAR+ Scr | SIRPA    | 4746.6213 |
| IFN CAR+ Scr | THBD     | 4733.5539 |
| IFN CAR+ Scr | CKAP4    | 4634.3692 |
| IFN CAR+ Scr | SLC15A3  | 4634.0998 |
| IFN CAR+ Scr | ITGAL    | 4632.4379 |
| IFN CAR+ Scr | NUB1     | 4615.8332 |
| IFN CAR+ Scr | BST2     | 4604.1288 |
| IFN CAR+ Scr | BASP1    | 4554.9373 |
| IFN CAR+ Scr | ERO1A    | 4455.1377 |
| IFN CAR+ Scr | SORT1    | 4421.3489 |
| IFN CAR+ Scr | MBP      | 4305.4863 |
| IFN CAR+ Scr | BANF1    | 3995.254  |

|              |          |           |
|--------------|----------|-----------|
| IFN CAR+ Scr | CCR1     | 3972.2547 |
| IFN CAR+ Scr | ME1      | 3942.3811 |
| IFN CAR+ Scr | PPP1R12A | 3928.5801 |
| IFN CAR+ Scr | ARHGEF11 | 3738.4461 |
| IFN CAR+ Scr | PAG1     | 3697.8512 |
| IFN CAR+ Scr | H1-0     | 3606.1442 |
| IFN CAR+ Scr | MARCKSL1 | 3581.1635 |
| IFN CAR+ Scr | IL1RN    | 3564.248  |
| IFN CAR+ Scr | ISG20    | 3456.8516 |
| IFN CAR+ Scr | MANF     | 3435.3438 |
| IFN CAR+ Scr | CLIP1    | 3373.7772 |
| IFN CAR+ Scr | CD300A   | 3313.9764 |
| IFN CAR+ Scr | TRAFD1   | 3263.7043 |
| IFN CAR+ Scr | QSOX1    | 3200.7303 |
| IFN CAR+ Scr | SYAP1    | 3012.3032 |
| IFN CAR+ Scr | CARD6    | 2854.1559 |
| IFN CAR+ Scr | ADGRE2   | 2844.7262 |
| IFN CAR+ Scr | NSUN2    | 2797.9145 |
| IFN CAR+ Scr | IRF2BPL  | 2750.6989 |
| IFN CAR+ Scr | PECAM1   | 2729.1557 |
| IFN CAR+ Scr | EPB41L3  | 2699.6277 |
| IFN CAR+ Scr | CD59     | 2679.0964 |
| IFN CAR+ Scr | PTPN2    | 2673.2433 |
| IFN CAR+ Scr | CASP10   | 2592.708  |
| IFN CAR+ Scr | FBXO6    | 2585.8192 |
| IFN CAR+ Scr | HMOX1    | 2570.5293 |
| IFN CAR+ Scr | TANK     | 2536.1568 |
| IFN CAR+ Scr | TWF1     | 2438.7842 |
| IFN CAR+ Scr | ENDOD1   | 2424.9967 |
| IFN CAR+ Scr | FKBP1A   | 2397.808  |
| IFN CAR+ Scr | ENG      | 2388.6892 |

|              |          |           |
|--------------|----------|-----------|
| IFN CAR+ Scr | FCHO2    | 2381.5734 |
| IFN CAR+ Scr | ENO2     | 2329.5797 |
| IFN CAR+ Scr | POSTN    | 2312.9609 |
| IFN CAR+ Scr | GRIPAP1  | 2244.5437 |
| IFN CAR+ Scr | MX2      | 2185.2035 |
| IFN CAR+ Scr | UNC93B1  | 2179.852  |
| IFN CAR+ Scr | CYLD     | 2161.6301 |
| IFN CAR+ Scr | LSP1     | 2077.4495 |
| IFN CAR+ Scr | RELB     | 2022.5708 |
| IFN CAR+ Scr | PYROXD1  | 1892.2829 |
| IFN CAR+ Scr | FAM177A1 | 1871.3461 |
| IFN CAR+ Scr | LAT      | 1759.1108 |
| IFN CAR+ Scr | OXR1     | 1690.3493 |
| IFN CAR+ Scr | UBXN4    | 1648.9428 |
| IFN CAR+ Scr | MARCKS   | 1619.8697 |
| IFN CAR+ Scr | MMP9     | 1618.6064 |
| IFN CAR+ Scr | SLC4A7   | 1473.1158 |
| IFN CAR+ Scr | GSDME    | 1468.5311 |
| IFN CAR+ Scr | SLC37A2  | 1462.1719 |
| IFN CAR+ Scr | LIPA     | 1441.4926 |
| IFN CAR+ Scr | MPP1     | 1412.8655 |
| IFN CAR+ Scr | HIVEP3   | 1360.8494 |
| IFN CAR+ Scr | HLA-H    | 1338.4181 |
| IFN CAR+ Scr | LNPEP    | 1285.16   |
| IFN CAR+ Scr | NPL      | 1256.0605 |
| IFN CAR+ Scr | SESN2    | 1209.5836 |
| IFN CAR+ Scr | BTN3A3   | 1083.7799 |
| IFN CAR+ Scr | OPTN     | 1032.9884 |
| IFN CAR+ Scr | ITGA5    | 1017.2782 |
| IFN CAR+ Scr | FAT1     | 995.6226  |
| IFN CAR+ Scr | CLN3     | 890.2501  |

|              |            |             |
|--------------|------------|-------------|
| IFN CAR+ Scr | SARS1      | 878.4754    |
| IFN CAR+ Scr | CNNM4      | 848.0329    |
| IFN CAR+ Scr | CSGALNACT2 | 842.182     |
| IFN CAR+ Scr | STEAP1     | 824.9439    |
| IFN CAR+ Scr | TMEM120A   | 803.6429    |
| IFN CAR+ Scr | YAP1       | 775.6664    |
| IFN CAR+ Scr | SQSTM1     | 753.4119    |
| IFN CAR+ Scr | SPECC1     | 696.5449    |
| IFN CAR+ Scr | TNIK       | 680.8898    |
| IFN CAR+ Scr | THBS1      | 634.2703    |
| IFN CAR+ Scr | MADD       | 591.4788    |
| IFN CAR+ Scr | GPC4       | 543.5591    |
| IFN CAR+ Scr | ATP2B4     | 541.4537    |
| IFN CAR+ Scr | CALCOCO2   | 532.1373    |
| IFN CAR+ Scr | KRTDAP     | 489.7563    |
| IFN CAR+ Scr | ANTXR2     | 431.7433    |
| IFN CAR+ Scr | COL7A1     | 429.5411    |
| IFN CAR+ Scr | C2CD2L     | 365.1189    |
| IFN CAR+ Scr | KIDINS220  | 308.8258    |
| IFN CAR+ Scr | NUMB       | 186.1981    |
| IFN CAR+ Scr | PRRC2A     | 154.1465    |
| IFN CAR+ Scr | DAB2       | 96.8464     |
| IFN CAR+ Scr | NHERF1     | 92.4094     |
| IFN CAR+ Scr | GTF2F2     | 84.7883     |
| IFN CAR+ Scr | STXBP1     | 83.4719     |
| IFN CAR+ Scr | NDRG2      | 66.1137     |
| IFN CAR+ T2  | WARS1      | 538605.0172 |
| IFN CAR+ T2  | S100A8     | 157383.6494 |
| IFN CAR+ T2  | HLA-E      | 143651.6925 |
| IFN CAR+ T2  | STAT1      | 142033.7365 |
| IFN CAR+ T2  | PRDX6      | 115771.4093 |

|             |         |             |
|-------------|---------|-------------|
| IFN CAR+ T2 | LAP3    | 102220.2467 |
| IFN CAR+ T2 | GBP1    | 99631.7526  |
| IFN CAR+ T2 | IFIT3   | 98834.8279  |
| IFN CAR+ T2 | GBP2    | 97871.8159  |
| IFN CAR+ T2 | TAPBP   | 97025.9015  |
| IFN CAR+ T2 | HLA-C   | 87889.7238  |
| IFN CAR+ T2 | PFN1    | 87352.6667  |
| IFN CAR+ T2 | TYMP    | 77000.7     |
| IFN CAR+ T2 | S100A9  | 73085.5403  |
| IFN CAR+ T2 | PSME1   | 51633.146   |
| IFN CAR+ T2 | HLA-B   | 50243.2616  |
| IFN CAR+ T2 | LMNB1   | 48916.38    |
| IFN CAR+ T2 | MCM7    | 46093.7938  |
| IFN CAR+ T2 | YWHAQ   | 45047.5408  |
| IFN CAR+ T2 | ARHGDIB | 44720.6438  |
| IFN CAR+ T2 | A2M     | 41307.6933  |
| IFN CAR+ T2 | ACO2    | 35438.3368  |
| IFN CAR+ T2 | PLEK    | 33642.2807  |
| IFN CAR+ T2 | GLUL    | 30342.5476  |
| IFN CAR+ T2 | IFITM3  | 28464.5112  |
| IFN CAR+ T2 | CTSS    | 27617.5421  |
| IFN CAR+ T2 | SET     | 27239.2142  |
| IFN CAR+ T2 | ARHGAP1 | 26012.4227  |
| IFN CAR+ T2 | STMN1   | 25980.159   |
| IFN CAR+ T2 | ITGB7   | 25006.3715  |
| IFN CAR+ T2 | PTGS1   | 23963.529   |
| IFN CAR+ T2 | RBBP7   | 23021.1303  |
| IFN CAR+ T2 | MCM2    | 21005.1803  |
| IFN CAR+ T2 | APOL2   | 19856.6665  |
| IFN CAR+ T2 | CASP1   | 19822.002   |
| IFN CAR+ T2 | HLA-H   | 19396.9381  |

|             |          |            |
|-------------|----------|------------|
| IFN CAR+ T2 | CNN2     | 17703.7601 |
| IFN CAR+ T2 | SMARCC2  | 15505.7036 |
| IFN CAR+ T2 | RAD21    | 15031.4078 |
| IFN CAR+ T2 | SCIN     | 14993.4445 |
| IFN CAR+ T2 | CASP3    | 14244.289  |
| IFN CAR+ T2 | CPNE2    | 14209.366  |
| IFN CAR+ T2 | UBE2L6   | 14100.6439 |
| IFN CAR+ T2 | ADK      | 13612.9599 |
| IFN CAR+ T2 | UBE2I    | 13601.0736 |
| IFN CAR+ T2 | OXCT1    | 13476.302  |
| IFN CAR+ T2 | CYRIA    | 12508.2807 |
| IFN CAR+ T2 | CDK6     | 12409.4566 |
| IFN CAR+ T2 | PRDX2    | 11711.5315 |
| IFN CAR+ T2 | SCPEP1   | 11609.392  |
| IFN CAR+ T2 | UQCRFS1  | 10998.1863 |
| IFN CAR+ T2 | OAS1     | 10925.9135 |
| IFN CAR+ T2 | IFI35    | 10525.9784 |
| IFN CAR+ T2 | CTSZ     | 10446.3112 |
| IFN CAR+ T2 | BST2     | 10278.9288 |
| IFN CAR+ T2 | PRPS2    | 10246.5182 |
| IFN CAR+ T2 | PARP14   | 10049.8484 |
| IFN CAR+ T2 | AKR7A2   | 9906.6653  |
| IFN CAR+ T2 | NMI      | 9834.5051  |
| IFN CAR+ T2 | RDX      | 9790.9673  |
| IFN CAR+ T2 | NUB1     | 9514.8012  |
| IFN CAR+ T2 | AKR1B1   | 9195.1742  |
| IFN CAR+ T2 | KIAA0930 | 9097.0632  |
| IFN CAR+ T2 | UBA7     | 9052.3227  |
| IFN CAR+ T2 | SDSL     | 9032.1413  |
| IFN CAR+ T2 | PCNA     | 9015.1309  |
| IFN CAR+ T2 | TMPO     | 9006.2881  |

|             |          |           |
|-------------|----------|-----------|
| IFN CAR+ T2 | APOBEC3G | 9005.6919 |
| IFN CAR+ T2 | FEN1     | 8950.0426 |
| IFN CAR+ T2 | SDHB     | 8840.6436 |
| IFN CAR+ T2 | ITGAL    | 8774.8379 |
| IFN CAR+ T2 | BUB3     | 8767.3422 |
| IFN CAR+ T2 | ACAA2    | 8637.892  |
| IFN CAR+ T2 | LGALS3BP | 8201.3968 |
| IFN CAR+ T2 | HAT1     | 8108.1915 |
| IFN CAR+ T2 | DBN1     | 8000.6177 |
| IFN CAR+ T2 | ADGRE5   | 7835.0107 |
| IFN CAR+ T2 | GGCT     | 7825.4279 |
| IFN CAR+ T2 | MCM5     | 7799.8274 |
| IFN CAR+ T2 | NDUFS1   | 7101.9363 |
| IFN CAR+ T2 | PGGT1B   | 7044.0348 |
| IFN CAR+ T2 | HLA-F    | 6696.9059 |
| IFN CAR+ T2 | NDUFV1   | 6594.2205 |
| IFN CAR+ T2 | CASP7    | 6502.37   |
| IFN CAR+ T2 | PACSIN2  | 6500.6563 |
| IFN CAR+ T2 | MCM3     | 6007.8511 |
| IFN CAR+ T2 | GALM     | 5882.9101 |
| IFN CAR+ T2 | NDUFS7   | 5872.9224 |
| IFN CAR+ T2 | RBBP4    | 5616.8757 |
| IFN CAR+ T2 | SLAMF8   | 5614.6928 |
| IFN CAR+ T2 | ISG20    | 5311.8196 |
| IFN CAR+ T2 | TMED4    | 5200.6863 |
| IFN CAR+ T2 | GMPS     | 5094.3966 |
| IFN CAR+ T2 | NHP2     | 5082.5964 |
| IFN CAR+ T2 | RB1      | 4962.2206 |
| IFN CAR+ T2 | CYLD     | 4959.1474 |
| IFN CAR+ T2 | NDUFA13  | 4863.7982 |
| IFN CAR+ T2 | TRIP13   | 4769.052  |

|             |          |           |
|-------------|----------|-----------|
| IFN CAR+ T2 | FOXK1    | 4745.8944 |
| IFN CAR+ T2 | SAMD9L   | 4742.1249 |
| IFN CAR+ T2 | DCK      | 4683.5669 |
| IFN CAR+ T2 | SCCPDH   | 4649.6033 |
| IFN CAR+ T2 | IVD      | 4639.6725 |
| IFN CAR+ T2 | CD40     | 4578.1888 |
| IFN CAR+ T2 | IFIH1    | 4569.6844 |
| IFN CAR+ T2 | PPP1R12A | 4518.6201 |
| IFN CAR+ T2 | IRAG2    | 4461.2349 |
| IFN CAR+ T2 | MCM4     | 4224.514  |
| IFN CAR+ T2 | MCM6     | 4202.8824 |
| IFN CAR+ T2 | NDUFA9   | 4117.98   |
| IFN CAR+ T2 | P2RX4    | 3965.4861 |
| IFN CAR+ T2 | GLOD4    | 3932.6112 |
| IFN CAR+ T2 | HEXB     | 3880.4709 |
| IFN CAR+ T2 | CMTM3    | 3866.3668 |
| IFN CAR+ T2 | STOM     | 3843.7878 |
| IFN CAR+ T2 | NDUFA11  | 3795.1439 |
| IFN CAR+ T2 | GGH      | 3765.0311 |
| IFN CAR+ T2 | NES      | 3722.3316 |
| IFN CAR+ T2 | SDHA     | 3560.1354 |
| IFN CAR+ T2 | TRAFD1   | 3521.1483 |
| IFN CAR+ T2 | DCPS     | 3352.6404 |
| IFN CAR+ T2 | NDUFA8   | 3325.4077 |
| IFN CAR+ T2 | MLKL     | 3316.5038 |
| IFN CAR+ T2 | BACC1    | 3313.2514 |
| IFN CAR+ T2 | APOBEC3C | 3249.9425 |
| IFN CAR+ T2 | SHMT1    | 3221.9735 |
| IFN CAR+ T2 | CKAP5    | 3190.2025 |
| IFN CAR+ T2 | ACADS    | 3163.1387 |
| IFN CAR+ T2 | MCCC2    | 3116.585  |

|             |          |           |
|-------------|----------|-----------|
| IFN CAR+ T2 | PACS1    | 3102.6923 |
| IFN CAR+ T2 | MCL1     | 3033.717  |
| IFN CAR+ T2 | CD70     | 3027.8915 |
| IFN CAR+ T2 | ARFIP1   | 2972.9946 |
| IFN CAR+ T2 | DDAH2    | 2950.5452 |
| IFN CAR+ T2 | SEPTIN11 | 2928.8412 |
| IFN CAR+ T2 | LSP1     | 2914.0975 |
| IFN CAR+ T2 | CCR1     | 2883.8987 |
| IFN CAR+ T2 | PLSCR1   | 2869.6623 |
| IFN CAR+ T2 | FBXO6    | 2797.5752 |
| IFN CAR+ T2 | NCK2     | 2770.0457 |
| IFN CAR+ T2 | RPA1     | 2710.9703 |
| IFN CAR+ T2 | CBFB     | 2703.1441 |
| IFN CAR+ T2 | NUDT19   | 2685.3301 |
| IFN CAR+ T2 | ACY1     | 2630.9565 |
| IFN CAR+ T2 | GAMT     | 2625.4388 |
| IFN CAR+ T2 | CALCOCO2 | 2516.8493 |
| IFN CAR+ T2 | NDUFV3   | 2484.8836 |
| IFN CAR+ T2 | RNF181   | 2484.2958 |
| IFN CAR+ T2 | XIRP1    | 2460.4955 |
| IFN CAR+ T2 | RFC5     | 2453.088  |
| IFN CAR+ T2 | UCHL5    | 2436.9876 |
| IFN CAR+ T2 | NDUFS3   | 2391.7148 |
| IFN CAR+ T2 | NDUFB8   | 2319.4483 |
| IFN CAR+ T2 | VRK1     | 2284.5933 |
| IFN CAR+ T2 | EVL      | 2202.2008 |
| IFN CAR+ T2 | CDK2     | 2186.4842 |
| IFN CAR+ T2 | RPA3     | 2123.7691 |
| IFN CAR+ T2 | SLC17A5  | 2099.6942 |
| IFN CAR+ T2 | DUT      | 2059.1699 |
| IFN CAR+ T2 | SPECC1   | 2047.6969 |

|             |          |           |
|-------------|----------|-----------|
| IFN CAR+ T2 | ADPRH    | 2040.3433 |
| IFN CAR+ T2 | LNPEP    | 2036.48   |
| IFN CAR+ T2 | ACAD11   | 2018.126  |
| IFN CAR+ T2 | CNPY3    | 1996.7168 |
| IFN CAR+ T2 | CYB5R2   | 1943.7664 |
| IFN CAR+ T2 | OSBPL3   | 1939.2443 |
| IFN CAR+ T2 | TKFC     | 1910.5874 |
| IFN CAR+ T2 | SCLY     | 1759.6536 |
| IFN CAR+ T2 | BAK1     | 1745.8441 |
| IFN CAR+ T2 | FAM107B  | 1745.6375 |
| IFN CAR+ T2 | HDAC2    | 1726.2613 |
| IFN CAR+ T2 | CHMP6    | 1718.9723 |
| IFN CAR+ T2 | SLC2A3   | 1705.0175 |
| IFN CAR+ T2 | BTN3A3   | 1680.2879 |
| IFN CAR+ T2 | ARHGEF11 | 1668.7181 |
| IFN CAR+ T2 | DNASE1L1 | 1657.6898 |
| IFN CAR+ T2 | GNAI1    | 1644.2505 |
| IFN CAR+ T2 | RPA2     | 1644.1069 |
| IFN CAR+ T2 | NUDT4    | 1643.1145 |
| IFN CAR+ T2 | ENDOD1   | 1640.5607 |
| IFN CAR+ T2 | NDUFB3   | 1632.3213 |
| IFN CAR+ T2 | CDK1     | 1626.5424 |
| IFN CAR+ T2 | SIAE     | 1530.1814 |
| IFN CAR+ T2 | POLD2    | 1517.6985 |
| IFN CAR+ T2 | ITGAX    | 1510.164  |
| IFN CAR+ T2 | GSTM4    | 1471.2666 |
| IFN CAR+ T2 | NUMA1    | 1457.2556 |
| IFN CAR+ T2 | NDUFA12  | 1443.653  |
| IFN CAR+ T2 | WDR70    | 1412.9022 |
| IFN CAR+ T2 | MYLK     | 1391.7883 |
| IFN CAR+ T2 | NXN      | 1391.6975 |

|             |         |           |
|-------------|---------|-----------|
| IFN CAR+ T2 | SNX4    | 1390.1376 |
| IFN CAR+ T2 | UQCRQ   | 1371.8037 |
| IFN CAR+ T2 | MX2     | 1354.3948 |
| IFN CAR+ T2 | HMG2    | 1352.8008 |
| IFN CAR+ T2 | SLC15A3 | 1314.3918 |
| IFN CAR+ T2 | FAHD2A  | 1312.9385 |
| IFN CAR+ T2 | NF2     | 1308.0359 |
| IFN CAR+ T2 | NUDT1   | 1290.9002 |
| IFN CAR+ T2 | CASP10  | 1282.4704 |
| IFN CAR+ T2 | NRGN    | 1280.1354 |
| IFN CAR+ T2 | EXOSC8  | 1253.846  |
| IFN CAR+ T2 | PTPN2   | 1209.944  |
| IFN CAR+ T2 | NDUFA5  | 1148.6071 |
| IFN CAR+ T2 | FAT1    | 1146.7826 |
| IFN CAR+ T2 | OPTN    | 1129.3684 |
| IFN CAR+ T2 | NELFCD  | 1051.7761 |
| IFN CAR+ T2 | UBR7    | 1028.7838 |
| IFN CAR+ T2 | TXNDC5  | 1018.1829 |
| IFN CAR+ T2 | PCTP    | 939.5784  |
| IFN CAR+ T2 | MFAP1   | 936.3945  |
| IFN CAR+ T2 | HIBCH   | 936.1222  |
| IFN CAR+ T2 | SESN2   | 834.8036  |
| IFN CAR+ T2 | BRD4    | 829.2665  |
| IFN CAR+ T2 | MT-ND2  | 781.4535  |
| IFN CAR+ T2 | ACP3    | 772.7332  |
| IFN CAR+ T2 | RCC2    | 764.4294  |
| IFN CAR+ T2 | ADAM10  | 743.2753  |
| IFN CAR+ T2 | MT-ND6  | 736.7053  |
| IFN CAR+ T2 | LIPA    | 730.2126  |
| IFN CAR+ T2 | PRKACB  | 680.3626  |
| IFN CAR+ T2 | ALDH1B1 | 669.8125  |

|             |           |          |
|-------------|-----------|----------|
| IFN CAR+ T2 | MARCKS    | 662.1497 |
| IFN CAR+ T2 | NSUN2     | 657.6345 |
| IFN CAR+ T2 | BDH2      | 657.0436 |
| IFN CAR+ T2 | MSH2      | 649.4165 |
| IFN CAR+ T2 | RFC4      | 633.017  |
| IFN CAR+ T2 | SPR       | 631.6477 |
| IFN CAR+ T2 | PPAT      | 631.2457 |
| IFN CAR+ T2 | MSR1      | 626.0144 |
| IFN CAR+ T2 | MORF4L1   | 612.8757 |
| IFN CAR+ T2 | UBL5      | 608.3466 |
| IFN CAR+ T2 | ELAC2     | 561.2614 |
| IFN CAR+ T2 | NHERF1    | 556.0334 |
| IFN CAR+ T2 | MED25     | 528.8366 |
| IFN CAR+ T2 | KANK2     | 523.567  |
| IFN CAR+ T2 | GTF2F2    | 506.9883 |
| IFN CAR+ T2 | UBXN4     | 501.1868 |
| IFN CAR+ T2 | ELF1      | 485.1759 |
| IFN CAR+ T2 | MT-ND3    | 427.0002 |
| IFN CAR+ T2 | XRCC1     | 416.0567 |
| IFN CAR+ T2 | IL1RN     | 388.488  |
| IFN CAR+ T2 | NR2C2AP   | 384.1444 |
| IFN CAR+ T2 | HIVEP3    | 384.0814 |
| IFN CAR+ T2 | GABPA     | 382.7733 |
| IFN CAR+ T2 | BCKDHA    | 375.4296 |
| IFN CAR+ T2 | PALD1     | 361.343  |
| IFN CAR+ T2 | ACBD5     | 354.7624 |
| IFN CAR+ T2 | BIN1      | 335.3786 |
| IFN CAR+ T2 | KIDINS220 | 331.6578 |
| IFN CAR+ T2 | MAN2A1    | 315.1601 |
| IFN CAR+ T2 | MADD      | 236.8668 |
| IFN CAR+ T2 | RNF149    | 207.8452 |

|                  |          |             |
|------------------|----------|-------------|
| IFN CAR+ T2      | NELFA    | 204.26      |
| IFN CAR+ T2      | CHMP1B   | 196.9382    |
| IFN CAR+ T2      | PDCD4    | 194.3282    |
| IFN CAR+ T2      | RNASEH2A | 166.2822    |
| IFN CAR+ T2      | CFAP20   | 147.8252    |
| IFN CAR+ T2      | KNTC1    | 120.8711    |
| IFN CAR+ T2      | NUDT16L1 | 118.2779    |
| IFN CAR+ T2      | ZC3HC1   | 93.2273     |
| IFN CAR+ T2      | DNAJC8   | 90.6428     |
| IFN CAR+ T2      | WLS      | 88.7701     |
| IFN CAR+ T2      | MTRF1L   | 75.2145     |
| IFN CAR+ T2      | FKBP9    | 66.7615     |
| IFN CAR+ T2      | CEP97    | 25.3427     |
| IFN CAR+ T2      | ZNF330   | 13.6656     |
| IL4, 10 CAR+ Scr | ANPEP    | 202486.3331 |
| IL4, 10 CAR+ Scr | TGM2     | 134315.8327 |
| IL4, 10 CAR+ Scr | CTSC     | 70205.1419  |
| IL4, 10 CAR+ Scr | PLAU     | 58832.9792  |
| IL4, 10 CAR+ Scr | CHI3L1   | 58404.4536  |
| IL4, 10 CAR+ Scr | CD44     | 48849.3182  |
| IL4, 10 CAR+ Scr | PLIN2    | 29469.453   |
| IL4, 10 CAR+ Scr | STIP1    | 27955.9038  |
| IL4, 10 CAR+ Scr | MMP1     | 26001.6555  |
| IL4, 10 CAR+ Scr | HMOX1    | 23648.9693  |
| IL4, 10 CAR+ Scr | ALCAM    | 23002.0278  |
| IL4, 10 CAR+ Scr | FN1      | 20134.233   |
| IL4, 10 CAR+ Scr | CTSL     | 19838.1278  |
| IL4, 10 CAR+ Scr | TIMP1    | 18658.1169  |
| IL4, 10 CAR+ Scr | H1-0     | 17876.4642  |
| IL4, 10 CAR+ Scr | S100P    | 16090.2919  |
| IL4, 10 CAR+ Scr | TYROBP   | 16022.7503  |

|                  |         |            |
|------------------|---------|------------|
| IL4, 10 CAR+ Scr | RCN1    | 15853.837  |
| IL4, 10 CAR+ Scr | NT5E    | 14695.1935 |
| IL4, 10 CAR+ Scr | STOM    | 14648.5878 |
| IL4, 10 CAR+ Scr | NRP1    | 12794.0523 |
| IL4, 10 CAR+ Scr | SYNGR2  | 12606.1737 |
| IL4, 10 CAR+ Scr | NSUN2   | 11825.0745 |
| IL4, 10 CAR+ Scr | SPP1    | 11401.7016 |
| IL4, 10 CAR+ Scr | ALDOC   | 11232.7813 |
| IL4, 10 CAR+ Scr | PCM1    | 11204.0338 |
| IL4, 10 CAR+ Scr | PSAT1   | 11078.1493 |
| IL4, 10 CAR+ Scr | COL6A1  | 10248.5446 |
| IL4, 10 CAR+ Scr | DAB2    | 9584.0464  |
| IL4, 10 CAR+ Scr | SLC4A7  | 9401.4238  |
| IL4, 10 CAR+ Scr | CD300A  | 9300.7764  |
| IL4, 10 CAR+ Scr | SBDS    | 9245.781   |
| IL4, 10 CAR+ Scr | SORT1   | 9022.6689  |
| IL4, 10 CAR+ Scr | ITGAM   | 8917.815   |
| IL4, 10 CAR+ Scr | PECAM1  | 8648.7957  |
| IL4, 10 CAR+ Scr | SLC20A1 | 8436.7411  |
| IL4, 10 CAR+ Scr | NPC1    | 8388.8832  |
| IL4, 10 CAR+ Scr | PLD3    | 7995.5629  |
| IL4, 10 CAR+ Scr | CALU    | 7958.8126  |
| IL4, 10 CAR+ Scr | MGLL    | 7690.819   |
| IL4, 10 CAR+ Scr | HBB;HBD | 7233.7918  |
| IL4, 10 CAR+ Scr | KCTD12  | 6822.6544  |
| IL4, 10 CAR+ Scr | ITGB3   | 6482.7487  |
| IL4, 10 CAR+ Scr | ADAM9   | 6314.6543  |
| IL4, 10 CAR+ Scr | BANF1   | 6129.934   |
| IL4, 10 CAR+ Scr | SOD2    | 6117.9323  |
| IL4, 10 CAR+ Scr | FCAR    | 6090.3344  |
| IL4, 10 CAR+ Scr | ME1     | 5680.0611  |

|                  |         |           |
|------------------|---------|-----------|
| IL4, 10 CAR+ Scr | LIMA1   | 5601.6058 |
| IL4, 10 CAR+ Scr | BASP1   | 5576.6973 |
| IL4, 10 CAR+ Scr | NPC2    | 5561.6762 |
| IL4, 10 CAR+ Scr | IL1RN   | 5399.928  |
| IL4, 10 CAR+ Scr | SPHK1   | 5339.2693 |
| IL4, 10 CAR+ Scr | ATP1B3  | 5336.8762 |
| IL4, 10 CAR+ Scr | NPTN    | 5334.3974 |
| IL4, 10 CAR+ Scr | TWF1    | 5281.4242 |
| IL4, 10 CAR+ Scr | LIPA    | 5271.3326 |
| IL4, 10 CAR+ Scr | OAT     | 5242.6919 |
| IL4, 10 CAR+ Scr | CD36    | 5154.5046 |
| IL4, 10 CAR+ Scr | PSMB6   | 4997.0632 |
| IL4, 10 CAR+ Scr | VAT1    | 4996.1333 |
| IL4, 10 CAR+ Scr | LGALS3  | 4915.0355 |
| IL4, 10 CAR+ Scr | LPL     | 4905.4851 |
| IL4, 10 CAR+ Scr | OXR1    | 4813.6693 |
| IL4, 10 CAR+ Scr | CD59    | 4666.1764 |
| IL4, 10 CAR+ Scr | SLC1A5  | 4477.1609 |
| IL4, 10 CAR+ Scr | FKBP1A  | 4231.208  |
| IL4, 10 CAR+ Scr | EVL     | 4205.6008 |
| IL4, 10 CAR+ Scr | ITGA2   | 4193.3724 |
| IL4, 10 CAR+ Scr | SARS1   | 4137.6754 |
| IL4, 10 CAR+ Scr | ERO1A   | 4110.2177 |
| IL4, 10 CAR+ Scr | QSOX1   | 3924.8383 |
| IL4, 10 CAR+ Scr | EPB41L3 | 3854.6957 |
| IL4, 10 CAR+ Scr | PCBD1   | 3784.9367 |
| IL4, 10 CAR+ Scr | WIPF1   | 3779.1051 |
| IL4, 10 CAR+ Scr | BZW2    | 3591.7785 |
| IL4, 10 CAR+ Scr | MMP9    | 3495.8864 |
| IL4, 10 CAR+ Scr | EIF4B   | 3347.8063 |
| IL4, 10 CAR+ Scr | LAT     | 3260.2188 |

|                  |          |           |
|------------------|----------|-----------|
| IL4, 10 CAR+ Scr | RGS10    | 3256.1281 |
| IL4, 10 CAR+ Scr | TTC1     | 3146.1585 |
| IL4, 10 CAR+ Scr | MANF     | 3025.5838 |
| IL4, 10 CAR+ Scr | GPC4     | 2913.9991 |
| IL4, 10 CAR+ Scr | ENO2     | 2913.7957 |
| IL4, 10 CAR+ Scr | MBP      | 2787.9263 |
| IL4, 10 CAR+ Scr | THBS1    | 2257.2303 |
| IL4, 10 CAR+ Scr | ANTXR2   | 2198.8913 |
| IL4, 10 CAR+ Scr | CKAP4    | 2195.2892 |
| IL4, 10 CAR+ Scr | NDRG2    | 2173.9257 |
| IL4, 10 CAR+ Scr | TIMP3    | 2154.0614 |
| IL4, 10 CAR+ Scr | MAN2A1   | 2140.4641 |
| IL4, 10 CAR+ Scr | PYCR2    | 2128.1263 |
| IL4, 10 CAR+ Scr | PRRC2A   | 2086.2345 |
| IL4, 10 CAR+ Scr | AIF1     | 2025.9034 |
| IL4, 10 CAR+ Scr | CRYBB1   | 2020.0028 |
| IL4, 10 CAR+ Scr | MTSS1    | 2017.693  |
| IL4, 10 CAR+ Scr | TNIK     | 1990.7058 |
| IL4, 10 CAR+ Scr | BAK1     | 1823.6041 |
| IL4, 10 CAR+ Scr | SQSTM1   | 1777.6239 |
| IL4, 10 CAR+ Scr | SYAP1    | 1713.5032 |
| IL4, 10 CAR+ Scr | NUDT16L1 | 1697.0533 |
| IL4, 10 CAR+ Scr | FCHO2    | 1668.3094 |
| IL4, 10 CAR+ Scr | POSTN    | 1668.0769 |
| IL4, 10 CAR+ Scr | RGS14    | 1485.2688 |
| IL4, 10 CAR+ Scr | PGGT1B   | 1388.3548 |
| IL4, 10 CAR+ Scr | GSDME    | 1368.2111 |
| IL4, 10 CAR+ Scr | RAI14    | 1235.7646 |
| IL4, 10 CAR+ Scr | NPL      | 1227.4085 |
| IL4, 10 CAR+ Scr | THBD     | 1184.2859 |
| IL4, 10 CAR+ Scr | SIRPA    | 1100.1013 |

|                  |            |           |
|------------------|------------|-----------|
| IL4, 10 CAR+ Scr | UBL5       | 1061.4906 |
| IL4, 10 CAR+ Scr | LACC1      | 1013.5362 |
| IL4, 10 CAR+ Scr | KIDINS220  | 945.1018  |
| IL4, 10 CAR+ Scr | C2CD2L     | 920.6749  |
| IL4, 10 CAR+ Scr | ADGRE2     | 907.1342  |
| IL4, 10 CAR+ Scr | EXOSC8     | 883.646   |
| IL4, 10 CAR+ Scr | CEMIP2     | 838.3395  |
| IL4, 10 CAR+ Scr | NUDT4      | 803.7145  |
| IL4, 10 CAR+ Scr | BTN2A1     | 800.1564  |
| IL4, 10 CAR+ Scr | SCARB1     | 787.6849  |
| IL4, 10 CAR+ Scr | MARCKSL1   | 772.7635  |
| IL4, 10 CAR+ Scr | SLC15A3    | 716.0078  |
| IL4, 10 CAR+ Scr | PAG1       | 618.6112  |
| IL4, 10 CAR+ Scr | CSGALNACT2 | 600.106   |
| IL4, 10 CAR+ Scr | ZNF330     | 588.5994  |
| IL4, 10 CAR+ Scr | YAP1       | 551.9681  |
| IL4, 10 CAR+ Scr | FAM177A1   | 549.4901  |
| IL4, 10 CAR+ Scr | CD37       | 477.1498  |
| IL4, 10 CAR+ Scr | BET1       | 453.7187  |
| IL4, 10 CAR+ Scr | STEAP1     | 445.755   |
| IL4, 10 CAR+ Scr | SDC2       | 440.3385  |
| IL4, 10 CAR+ Scr | ENG        | 325.4492  |
| IL4, 10 CAR+ Scr | PTPRJ      | 318.2552  |
| IL4, 10 CAR+ Scr | COL7A1     | 317.7331  |
| IL4, 10 CAR+ Scr | APMAP      | 306.1382  |
| IL4, 10 CAR+ Scr | UNC93B1    | 217.636   |
| IL4, 10 CAR+ Scr | DAGLB      | 209.5714  |
| IL4, 10 CAR+ Scr | ATP2B4     | 173.2676  |
| IL4, 10 CAR+ Scr | TANK       | 172.1928  |
| IL4, 10 CAR+ Scr | CLIP1      | 167.8572  |
| IL4, 10 CAR+ Scr | MPP1       | 117.818   |

|                  |          |             |
|------------------|----------|-------------|
| IL4, 10 CAR+ Scr | CCR1     | 101.5667    |
| IL4, 10 CAR+ Scr | PRDX5    | 82.4703     |
| IL4, 10 CAR+ Scr | TMEM120A | 6.0476      |
| IL4, 10 CAR+ T2  | PFN1     | 492616.6667 |
| IL4, 10 CAR+ T2  | PRDX6    | 179636.2093 |
| IL4, 10 CAR+ T2  | PRDX2    | 76881.5315  |
| IL4, 10 CAR+ T2  | STMN1    | 73849.359   |
| IL4, 10 CAR+ T2  | ARHGDIB  | 67664.2438  |
| IL4, 10 CAR+ T2  | STOM     | 63017.3878  |
| IL4, 10 CAR+ T2  | ANPEP    | 61290.7331  |
| IL4, 10 CAR+ T2  | MCM7     | 51878.5938  |
| IL4, 10 CAR+ T2  | RBBP7    | 49855.9303  |
| IL4, 10 CAR+ T2  | ACO2     | 47603.9368  |
| IL4, 10 CAR+ T2  | SET      | 47250.8142  |
| IL4, 10 CAR+ T2  | CD44     | 41267.7182  |
| IL4, 10 CAR+ T2  | YWHAQ    | 38163.1408  |
| IL4, 10 CAR+ T2  | UBE2I    | 37406.1936  |
| IL4, 10 CAR+ T2  | PCNA     | 29675.9309  |
| IL4, 10 CAR+ T2  | PTGS1    | 29469.529   |
| IL4, 10 CAR+ T2  | MCM2     | 27971.0603  |
| IL4, 10 CAR+ T2  | SCIN     | 26981.3645  |
| IL4, 10 CAR+ T2  | FEN1     | 22340.7226  |
| IL4, 10 CAR+ T2  | VCL      | 22062.4007  |
| IL4, 10 CAR+ T2  | GGCT     | 21501.8279  |
| IL4, 10 CAR+ T2  | PACSIN2  | 20231.4163  |
| IL4, 10 CAR+ T2  | ADK      | 19571.2399  |
| IL4, 10 CAR+ T2  | HEXB     | 19520.4309  |
| IL4, 10 CAR+ T2  | AKR7A2   | 18552.1453  |
| IL4, 10 CAR+ T2  | RDX      | 18365.7673  |
| IL4, 10 CAR+ T2  | AKR1B1   | 18200.2942  |
| IL4, 10 CAR+ T2  | CPNE2    | 18039.726   |

|                 |         |            |
|-----------------|---------|------------|
| IL4, 10 CAR+ T2 | CNN2    | 17121.7201 |
| IL4, 10 CAR+ T2 | ECM1    | 16320.6023 |
| IL4, 10 CAR+ T2 | ARHGAP1 | 16030.7827 |
| IL4, 10 CAR+ T2 | LMNB1   | 14309.18   |
| IL4, 10 CAR+ T2 | BUB3    | 14262.0222 |
| IL4, 10 CAR+ T2 | MCM3    | 13690.6511 |
| IL4, 10 CAR+ T2 | TGM2    | 13230.1127 |
| IL4, 10 CAR+ T2 | GLOD4   | 13072.5712 |
| IL4, 10 CAR+ T2 | OXCT1   | 12648.062  |
| IL4, 10 CAR+ T2 | RBBP4   | 12477.5157 |
| IL4, 10 CAR+ T2 | TK1     | 12366.6188 |
| IL4, 10 CAR+ T2 | MCM4    | 12176.954  |
| IL4, 10 CAR+ T2 | UQCRFS1 | 12073.4663 |
| IL4, 10 CAR+ T2 | RCC2    | 11766.1094 |
| IL4, 10 CAR+ T2 | NUDT4   | 11731.9145 |
| IL4, 10 CAR+ T2 | APMAP   | 11724.4182 |
| IL4, 10 CAR+ T2 | DUT     | 11014.5699 |
| IL4, 10 CAR+ T2 | PPM1G   | 10646.813  |
| IL4, 10 CAR+ T2 | DBN1    | 10628.5777 |
| IL4, 10 CAR+ T2 | BSG     | 10570.4706 |
| IL4, 10 CAR+ T2 | SDHB    | 10566.3236 |
| IL4, 10 CAR+ T2 | BZW2    | 10417.2985 |
| IL4, 10 CAR+ T2 | MCM6    | 10314.6424 |
| IL4, 10 CAR+ T2 | CBFB    | 10083.2241 |
| IL4, 10 CAR+ T2 | MYLK    | 9928.0283  |
| IL4, 10 CAR+ T2 | PSME1   | 9299.946   |
| IL4, 10 CAR+ T2 | CTSC    | 9199.5419  |
| IL4, 10 CAR+ T2 | TXNDC5  | 9170.9829  |
| IL4, 10 CAR+ T2 | CNPY3   | 9026.1568  |
| IL4, 10 CAR+ T2 | HAT1    | 8489.3915  |
| IL4, 10 CAR+ T2 | CD109   | 8401.5335  |

|                 |         |           |
|-----------------|---------|-----------|
| IL4, 10 CAR+ T2 | ADAM10  | 8397.5153 |
| IL4, 10 CAR+ T2 | GGH     | 8327.3111 |
| IL4, 10 CAR+ T2 | NDUFV1  | 8315.0205 |
| IL4, 10 CAR+ T2 | MCM5    | 8092.9874 |
| IL4, 10 CAR+ T2 | PRDX5   | 8043.3903 |
| IL4, 10 CAR+ T2 | RRM1    | 7995.0411 |
| IL4, 10 CAR+ T2 | MELTF   | 7984.7427 |
| IL4, 10 CAR+ T2 | IVD     | 7404.8725 |
| IL4, 10 CAR+ T2 | SDHA    | 7379.0154 |
| IL4, 10 CAR+ T2 | RPA1    | 7356.0503 |
| IL4, 10 CAR+ T2 | DHFR    | 7292.4592 |
| IL4, 10 CAR+ T2 | RB1     | 7246.8206 |
| IL4, 10 CAR+ T2 | KPNA2   | 7090.3433 |
| IL4, 10 CAR+ T2 | GMPS    | 6980.4766 |
| IL4, 10 CAR+ T2 | CDK1    | 6808.3104 |
| IL4, 10 CAR+ T2 | SCCPDH  | 6719.2433 |
| IL4, 10 CAR+ T2 | TMED4   | 6678.6463 |
| IL4, 10 CAR+ T2 | DCPS    | 6479.2804 |
| IL4, 10 CAR+ T2 | SMARCC2 | 6414.6236 |
| IL4, 10 CAR+ T2 | NCK2    | 6054.8057 |
| IL4, 10 CAR+ T2 | DNAJC8  | 5963.6828 |
| IL4, 10 CAR+ T2 | BDH2    | 5753.8516 |
| IL4, 10 CAR+ T2 | CHMP1B  | 5696.5782 |
| IL4, 10 CAR+ T2 | BACC1   | 5637.0514 |
| IL4, 10 CAR+ T2 | TRIP13  | 5592.892  |
| IL4, 10 CAR+ T2 | SLC1A4  | 5566.1576 |
| IL4, 10 CAR+ T2 | MRC2    | 5556.4803 |
| IL4, 10 CAR+ T2 | RRM2    | 5543.934  |
| IL4, 10 CAR+ T2 | RPA3    | 5459.6891 |
| IL4, 10 CAR+ T2 | RPA2    | 5405.3869 |
| IL4, 10 CAR+ T2 | ACAA2   | 5325.052  |

|                 |                   |           |
|-----------------|-------------------|-----------|
| IL4, 10 CAR+ T2 | SPR               | 5186.2077 |
| IL4, 10 CAR+ T2 | UBE2H             | 5083.9805 |
| IL4, 10 CAR+ T2 | HIBCH             | 4978.6822 |
| IL4, 10 CAR+ T2 | DCK               | 4856.3269 |
| IL4, 10 CAR+ T2 | UCHL5             | 4720.9476 |
| IL4, 10 CAR+ T2 | CYB5R2            | 4707.2904 |
| IL4, 10 CAR+ T2 | GAMT              | 4662.1988 |
| IL4, 10 CAR+ T2 | COL6A1            | 4549.4246 |
| IL4, 10 CAR+ T2 | PCBD1             | 4544.8167 |
| IL4, 10 CAR+ T2 | ACP3              | 4496.0412 |
| IL4, 10 CAR+ T2 | ANXA8;ANXA8L<br>1 | 4478.3086 |
| IL4, 10 CAR+ T2 | NDUFS7            | 4362.9224 |
| IL4, 10 CAR+ T2 | CMTM3             | 4269.9668 |
| IL4, 10 CAR+ T2 | CDK2              | 4234.1642 |
| IL4, 10 CAR+ T2 | CEMIP2            | 4024.0235 |
| IL4, 10 CAR+ T2 | SYNGR2            | 3977.9337 |
| IL4, 10 CAR+ T2 | CYRIA             | 3977.0407 |
| IL4, 10 CAR+ T2 | NDUFS1            | 3946.4563 |
| IL4, 10 CAR+ T2 | GSTM4             | 3905.5066 |
| IL4, 10 CAR+ T2 | SHMT1             | 3818.3735 |
| IL4, 10 CAR+ T2 | CDK6              | 3807.6566 |
| IL4, 10 CAR+ T2 | NES               | 3729.1716 |
| IL4, 10 CAR+ T2 | PYCR2             | 3699.0863 |
| IL4, 10 CAR+ T2 | DNASE1L1          | 3680.4658 |
| IL4, 10 CAR+ T2 | IRAG2             | 3620.6749 |
| IL4, 10 CAR+ T2 | FOXK1             | 3526.4144 |
| IL4, 10 CAR+ T2 | NCALD             | 3495.3303 |
| IL4, 10 CAR+ T2 | NDUFA13           | 3358.6382 |
| IL4, 10 CAR+ T2 | MT-ND3            | 3339.6522 |
| IL4, 10 CAR+ T2 | PSMB6             | 3295.7032 |
| IL4, 10 CAR+ T2 | NELFCD            | 3251.9681 |

|                 |         |           |
|-----------------|---------|-----------|
| IL4, 10 CAR+ T2 | NDUFA11 | 3122.5439 |
| IL4, 10 CAR+ T2 | CFAP20  | 3087.0132 |
| IL4, 10 CAR+ T2 | NDUFA8  | 3070.0877 |
| IL4, 10 CAR+ T2 | BIN1    | 3069.2306 |
| IL4, 10 CAR+ T2 | SCPEP1  | 3043.392  |
| IL4, 10 CAR+ T2 | RCN1    | 3036.397  |
| IL4, 10 CAR+ T2 | NDUFB8  | 2994.6483 |
| IL4, 10 CAR+ T2 | MSH2    | 2990.4765 |
| IL4, 10 CAR+ T2 | RFC4    | 2882.181  |
| IL4, 10 CAR+ T2 | RAD21   | 2841.3678 |
| IL4, 10 CAR+ T2 | PRPS2   | 2769.1982 |
| IL4, 10 CAR+ T2 | NDUFV3  | 2764.3036 |
| IL4, 10 CAR+ T2 | SBDS    | 2709.741  |
| IL4, 10 CAR+ T2 | DDAH2   | 2704.3852 |
| IL4, 10 CAR+ T2 | PPAT    | 2659.5857 |
| IL4, 10 CAR+ T2 | NUDT1   | 2642.5762 |
| IL4, 10 CAR+ T2 | SNX4    | 2621.5856 |
| IL4, 10 CAR+ T2 | ACY1    | 2589.4365 |
| IL4, 10 CAR+ T2 | MT-ND6  | 2523.9773 |
| IL4, 10 CAR+ T2 | SORT1   | 2507.7889 |
| IL4, 10 CAR+ T2 | UBL5    | 2487.5266 |
| IL4, 10 CAR+ T2 | NXN     | 2479.6575 |
| IL4, 10 CAR+ T2 | UBA7    | 2453.4427 |
| IL4, 10 CAR+ T2 | VRK1    | 2411.6373 |
| IL4, 10 CAR+ T2 | ELAC2   | 2365.0334 |
| IL4, 10 CAR+ T2 | APIP    | 2363.4405 |
| IL4, 10 CAR+ T2 | UBE2S   | 2349.5564 |
| IL4, 10 CAR+ T2 | DAB2    | 2315.2864 |
| IL4, 10 CAR+ T2 | FKBP9   | 2275.8015 |
| IL4, 10 CAR+ T2 | NDUFS3  | 2250.5148 |
| IL4, 10 CAR+ T2 | HDAC2   | 2242.1413 |

|                 |          |           |
|-----------------|----------|-----------|
| IL4, 10 CAR+ T2 | NHERF1   | 2239.6974 |
| IL4, 10 CAR+ T2 | SEPTIN11 | 2217.4412 |
| IL4, 10 CAR+ T2 | SCARB1   | 2174.2009 |
| IL4, 10 CAR+ T2 | NDUFB3   | 2146.3613 |
| IL4, 10 CAR+ T2 | NUMA1    | 2124.8956 |
| IL4, 10 CAR+ T2 | NR2C2AP  | 2097.9404 |
| IL4, 10 CAR+ T2 | CHMP6    | 2095.6923 |
| IL4, 10 CAR+ T2 | RSF1     | 2068.8552 |
| IL4, 10 CAR+ T2 | SIL1     | 2061.4901 |
| IL4, 10 CAR+ T2 | SCLY     | 2041.0136 |
| IL4, 10 CAR+ T2 | SIAE     | 1990.5894 |
| IL4, 10 CAR+ T2 | LPL      | 1826.8651 |
| IL4, 10 CAR+ T2 | CD151    | 1826.5151 |
| IL4, 10 CAR+ T2 | LIMA1    | 1750.8058 |
| IL4, 10 CAR+ T2 | PLBD2    | 1700.1825 |
| IL4, 10 CAR+ T2 | CKAP5    | 1689.1225 |
| IL4, 10 CAR+ T2 | UBR7     | 1654.5918 |
| IL4, 10 CAR+ T2 | RFC5     | 1585.656  |
| IL4, 10 CAR+ T2 | OSBPL3   | 1558.9603 |
| IL4, 10 CAR+ T2 | TDP1     | 1538.8304 |
| IL4, 10 CAR+ T2 | TKFC     | 1523.5754 |
| IL4, 10 CAR+ T2 | MCCC2    | 1476.225  |
| IL4, 10 CAR+ T2 | RGS14    | 1466.3888 |
| IL4, 10 CAR+ T2 | PALD1    | 1460.255  |
| IL4, 10 CAR+ T2 | ARFIP1   | 1343.7946 |
| IL4, 10 CAR+ T2 | EXOSC8   | 1338.126  |
| IL4, 10 CAR+ T2 | KANK2    | 1336.787  |
| IL4, 10 CAR+ T2 | WDR70    | 1328.8222 |
| IL4, 10 CAR+ T2 | NDUFA5   | 1306.8871 |
| IL4, 10 CAR+ T2 | MORF4L1  | 1304.4877 |
| IL4, 10 CAR+ T2 | SERPINI1 | 1267.9493 |

|                 |          |           |
|-----------------|----------|-----------|
| IL4, 10 CAR+ T2 | RNASEH2A | 1262.1542 |
| IL4, 10 CAR+ T2 | NDUFA12  | 1257.273  |
| IL4, 10 CAR+ T2 | ITGAX    | 1251.804  |
| IL4, 10 CAR+ T2 | NUDT19   | 1239.1381 |
| IL4, 10 CAR+ T2 | MANF     | 1189.1038 |
| IL4, 10 CAR+ T2 | ALDH1B1  | 1135.5845 |
| IL4, 10 CAR+ T2 | XRCC1    | 1126.3967 |
| IL4, 10 CAR+ T2 | ACADS    | 1123.4187 |
| IL4, 10 CAR+ T2 | GNAI1    | 1027.7945 |
| IL4, 10 CAR+ T2 | FAHD2A   | 987.1785  |
| IL4, 10 CAR+ T2 | ITGAM    | 986.135   |
| IL4, 10 CAR+ T2 | NF2      | 965.3639  |
| IL4, 10 CAR+ T2 | BRD4     | 959.4265  |
| IL4, 10 CAR+ T2 | NRGN     | 929.6754  |
| IL4, 10 CAR+ T2 | ATP1B3   | 926.5562  |
| IL4, 10 CAR+ T2 | SLC29A1  | 848.5988  |
| IL4, 10 CAR+ T2 | HMGN2    | 845.6448  |
| IL4, 10 CAR+ T2 | S100A8   | 798.4494  |
| IL4, 10 CAR+ T2 | OAT      | 798.2919  |
| IL4, 10 CAR+ T2 | SDC2     | 796.1345  |
| IL4, 10 CAR+ T2 | GABPA    | 778.7813  |
| IL4, 10 CAR+ T2 | GLIPR1   | 764.6909  |
| IL4, 10 CAR+ T2 | POLD2    | 752.0265  |
| IL4, 10 CAR+ T2 | LIPA     | 689.5726  |
| IL4, 10 CAR+ T2 | PLXNB2   | 668.3741  |
| IL4, 10 CAR+ T2 | COA7     | 558.7187  |
| IL4, 10 CAR+ T2 | ZNF330   | 556.9594  |
| IL4, 10 CAR+ T2 | ANTXR2   | 538.5273  |
| IL4, 10 CAR+ T2 | HIVEP3   | 496.2494  |
| IL4, 10 CAR+ T2 | NUDT16L1 | 469.2813  |
| IL4, 10 CAR+ T2 | PACS1    | 462.7563  |

|                 |          |          |
|-----------------|----------|----------|
| IL4, 10 CAR+ T2 | YAP1     | 443.7906 |
| IL4, 10 CAR+ T2 | TTC1     | 440.7185 |
| IL4, 10 CAR+ T2 | SPRY2    | 432.1782 |
| IL4, 10 CAR+ T2 | PDCD4    | 427.6762 |
| IL4, 10 CAR+ T2 | ADPRH    | 383.5433 |
| IL4, 10 CAR+ T2 | SDSL     | 381.3013 |
| IL4, 10 CAR+ T2 | MTRF1L   | 363.7191 |
| IL4, 10 CAR+ T2 | NELFA    | 356.932  |
| IL4, 10 CAR+ T2 | SLC8A1   | 347.1954 |
| IL4, 10 CAR+ T2 | MT-ND2   | 337.5295 |
| IL4, 10 CAR+ T2 | NDUFA9   | 304.28   |
| IL4, 10 CAR+ T2 | LNPEP    | 300.8    |
| IL4, 10 CAR+ T2 | EIF4B    | 209.1663 |
| IL4, 10 CAR+ T2 | BCKDHA   | 194.3616 |
| IL4, 10 CAR+ T2 | TMPO     | 162.6881 |
| IL4, 10 CAR+ T2 | KNTC1    | 151.3167 |
| IL4, 10 CAR+ T2 | ELF1     | 136.0319 |
| IL4, 10 CAR+ T2 | UQCRQ    | 133.8837 |
| IL4, 10 CAR+ T2 | MAN2A1   | 116.6121 |
| IL4, 10 CAR+ T2 | MED25    | 99.961   |
| IL4, 10 CAR+ T2 | APOBEC3C | 79.6065  |
| IL4, 10 CAR+ T2 | COL7A1   | 27.8051  |

**Supplementary Table 4.** Differentially expressed protein between CAR-HER2 basal and CAR-HER2

iTREM2

| Class          | Feature | Overexpression Score |
|----------------|---------|----------------------|
| CAR-HER2-BASAL | RPS20   | 120627.3333          |
| CAR-HER2-BASAL | PAXBP1  | 98545.2448           |
| CAR-HER2-BASAL | IL1B    | 81727.6              |
| CAR-HER2-BASAL | SRC     | 36089.0              |
| CAR-HER2-BASAL | KRTCAP2 | 27724.7667           |
| CAR-HER2-BASAL | SYNJ2   | 12346.4501           |
| CAR-HER2-BASAL | RNF114  | 8831.6487            |

|                |                |           |
|----------------|----------------|-----------|
| CAR-HER2-BASAL | ARMCX3         | 6164.3428 |
| CAR-HER2-BASAL | DCTN6          | 5978.2    |
| CAR-HER2-BASAL | PPIP5K2        | 5865.2067 |
| CAR-HER2-BASAL | EMC2           | 5603.2333 |
| CAR-HER2-BASAL | GPR68          | 5466.401  |
| CAR-HER2-BASAL | YPEL5          | 4826.2501 |
| CAR-HER2-BASAL | FITM2          | 4350.9676 |
| CAR-HER2-BASAL | POLR1F         | 4197.5233 |
| CAR-HER2-BASAL | NUP205         | 4184.5434 |
| CAR-HER2-BASAL | RASAL2         | 4163.8767 |
| CAR-HER2-BASAL | POLR2J;POLR2J3 | 3200.9846 |
| CAR-HER2-BASAL | C8orf33        | 3165.9723 |
| CAR-HER2-BASAL | NCKIPSD        | 3142.7194 |
| CAR-HER2-BASAL | DUSP4          | 2989.7208 |
| CAR-HER2-BASAL | MMP8           | 2936.72   |
| CAR-HER2-BASAL | PXN            | 2715.3886 |
| CAR-HER2-BASAL | SPAST          | 2628.0016 |
| CAR-HER2-BASAL | ERAL1          | 2529.6741 |
| CAR-HER2-BASAL | MRPL34         | 2475.9823 |
| CAR-HER2-BASAL | NUP188         | 2467.733  |
| CAR-HER2-BASAL | DNTTIP1        | 2376.5296 |
| CAR-HER2-BASAL | SCAF1          | 2357.864  |
| CAR-HER2-BASAL | SDR39U1        | 2355.6448 |
| CAR-HER2-BASAL | DHCR7          | 2239.5909 |
| CAR-HER2-BASAL | MAPKAP1        | 2155.0082 |
| CAR-HER2-BASAL | ADAT3          | 2104.3067 |
| CAR-HER2-BASAL | MRPL32         | 1965.9111 |
| CAR-HER2-BASAL | SPRY4          | 1845.9567 |
| CAR-HER2-BASAL | ZFYVE1         | 1740.8065 |
| CAR-HER2-BASAL | ATP13A3        | 1710.6667 |
| CAR-HER2-BASAL | CRNKL1         | 1702.4833 |
| CAR-HER2-BASAL | TELO2          | 1694.7083 |
| CAR-HER2-BASAL | KRIT1          | 1660.9848 |
| CAR-HER2-BASAL | NCAPG          | 1567.2465 |
| CAR-HER2-BASAL | MFSD3          | 1558.4    |
| CAR-HER2-BASAL | RRP7A          | 1399.7864 |
| CAR-HER2-BASAL | ENTPD1         | 1385.2738 |
| CAR-HER2-BASAL | PPP2R5B        | 1193.1665 |
| CAR-HER2-BASAL | TAOK2          | 1097.5288 |
| CAR-HER2-BASAL | SP140L         | 1072.3919 |
| CAR-HER2-BASAL | EBI3           | 1011.0205 |
| CAR-HER2-BASAL | TCF25          | 998.7929  |
| CAR-HER2-BASAL | RAB39A         | 985.5152  |
| CAR-HER2-BASAL | CMIP           | 872.8633  |

|                 |          |            |
|-----------------|----------|------------|
| CAR-HER2-BASAL  | GRAP     | 864.7538   |
| CAR-HER2-BASAL  | EZH2     | 734.772    |
| CAR-HER2-BASAL  | CAPN15   | 497.7004   |
| CAR-HER2-BASAL  | TRIM4    | 451.9603   |
| CAR-HER2-BASAL  | IGHMBP2  | 299.3432   |
| CAR-HER2-iTREM2 | NCL      | 134549.0   |
| CAR-HER2-iTREM2 | SFPQ     | 56859.0    |
| CAR-HER2-iTREM2 | EHHADH   | 56461.3333 |
| CAR-HER2-iTREM2 | SRSF7    | 37101.6667 |
| CAR-HER2-iTREM2 | DDX6     | 16595.0    |
| CAR-HER2-iTREM2 | GATM     | 11738.0    |
| CAR-HER2-iTREM2 | RRM2     | 11322.0    |
| CAR-HER2-iTREM2 | DCK      | 10985.3    |
| CAR-HER2-iTREM2 | BPHL     | 9756.7831  |
| CAR-HER2-iTREM2 | FLOT2    | 9449.0667  |
| CAR-HER2-iTREM2 | SRSF5    | 8430.5164  |
| CAR-HER2-iTREM2 | CCNA2    | 8124.8159  |
| CAR-HER2-iTREM2 | ENOSF1   | 7381.2667  |
| CAR-HER2-iTREM2 | CUL1     | 6137.3     |
| CAR-HER2-iTREM2 | CLINT1   | 5937.3333  |
| CAR-HER2-iTREM2 | PPP1R18  | 5352.9667  |
| CAR-HER2-iTREM2 | APOBEC3C | 5090.2322  |
| CAR-HER2-iTREM2 | ACADSB   | 4965.7333  |
| CAR-HER2-iTREM2 | EMILIN2  | 4802.8333  |
| CAR-HER2-iTREM2 | ACSS2    | 4466.1333  |
| CAR-HER2-iTREM2 | PARP10   | 3729.8532  |
| CAR-HER2-iTREM2 | OGA      | 2876.5     |
| CAR-HER2-iTREM2 | CDK2     | 2776.5     |
| CAR-HER2-iTREM2 | TOM1L2   | 2644.7381  |
| CAR-HER2-iTREM2 | MBLAC2   | 2618.1347  |
| CAR-HER2-iTREM2 | PRKCA    | 2455.7079  |
| CAR-HER2-iTREM2 | BCL10    | 2340.8533  |
| CAR-HER2-iTREM2 | NDUFA7   | 2291.5233  |
| CAR-HER2-iTREM2 | CEP250   | 2240.7811  |
| CAR-HER2-iTREM2 | YLPM1    | 2195.9868  |
| CAR-HER2-iTREM2 | PPP2R2D  | 2193.0     |
| CAR-HER2-iTREM2 | WDR41    | 1868.1229  |
| CAR-HER2-iTREM2 | NISCH    | 1815.1333  |
| CAR-HER2-iTREM2 | SLC7A6   | 1463.4829  |
| CAR-HER2-iTREM2 | MR1      | 1363.987   |
| CAR-HER2-iTREM2 | SRSF9    | 1262.5484  |
| CAR-HER2-iTREM2 | PCM1     | 1157.2692  |
| CAR-HER2-iTREM2 | CETN2    | 1135.5214  |
| CAR-HER2-iTREM2 | FHIP2B   | 734.4955   |

|                 |        |          |
|-----------------|--------|----------|
| CAR-HER2-iTREM2 | PDK2   | 722.5834 |
| CAR-HER2-iTREM2 | SUPT3H | 582.2586 |
| CAR-HER2-iTREM2 | FYB1   | 483.6254 |

**Supplementary Table 5.** Differentially expressed protein between CAR-HER2 basal and CAR-HER2 iTREM2 after treatment with IFN $\gamma$  or IL4/IL10

| Class          | Feature            | Overexpression Score |
|----------------|--------------------|----------------------|
| CAR-HER2-BASAL | PLAU               | 101328.6333          |
| CAR-HER2-BASAL | IL1B               | 64775.0133           |
| CAR-HER2-BASAL | MMP9               | 45401.1733           |
| CAR-HER2-BASAL | FN1                | 45345.8467           |
| CAR-HER2-BASAL | CD14               | 43917.3067           |
| CAR-HER2-BASAL | NCF1               | 22777.46             |
| CAR-HER2-BASAL | LGALS9             | 20344.6              |
| CAR-HER2-BASAL | CD109              | 17398.98             |
| CAR-HER2-BASAL | FEN1               | 13559.6733           |
| CAR-HER2-BASAL | SRC                | 12980.8              |
| CAR-HER2-BASAL | UHRF1              | 11747.1567           |
| CAR-HER2-BASAL | KIFC1              | 9091.092             |
| CAR-HER2-BASAL | TK1                | 7176.3933            |
| CAR-HER2-BASAL | COL7A1             | 6757.6567            |
| CAR-HER2-BASAL | PLXNB2             | 6198.6333            |
| CAR-HER2-BASAL | CNK3/IPCEF1;IPCEF1 | 5572.7               |
| CAR-HER2-BASAL | KANK2              | 5457.5293            |
| CAR-HER2-BASAL | DPYD               | 5200.0653            |
| CAR-HER2-BASAL | TIMP3              | 4601.7527            |
| CAR-HER2-BASAL | LIG1               | 4448.1933            |
| CAR-HER2-BASAL | RRM1               | 4338.7933            |
| CAR-HER2-BASAL | ARFGAP3            | 4080.3733            |
| CAR-HER2-BASAL | TYMS               | 3942.9775            |
| CAR-HER2-BASAL | DUT                | 3771.95              |
| CAR-HER2-BASAL | TACC3              | 3522.8593            |
| CAR-HER2-BASAL | NPM3               | 3485.5767            |
| CAR-HER2-BASAL | MKI67              | 3347.9127            |
| CAR-HER2-BASAL | CCNB1              | 3331.2215            |
| CAR-HER2-BASAL | FKBP2              | 3318.2533            |
| CAR-HER2-BASAL | ITM2C              | 3043.2732            |
| CAR-HER2-BASAL | PDCD4              | 2764.0853            |
| CAR-HER2-BASAL | DUSP4              | 2664.5283            |
| CAR-HER2-BASAL | COL6A2             | 2655.2307            |
| CAR-HER2-BASAL | MID1IP1            | 2306.0192            |
| CAR-HER2-BASAL | SPRY4              | 2165.5213            |
| CAR-HER2-BASAL | CLEC11A            | 2077.3233            |

|                |          |           |
|----------------|----------|-----------|
| CAR-HER2-BASAL | MTG1     | 2004.0945 |
| CAR-HER2-BASAL | KIF11    | 1990.7113 |
| CAR-HER2-BASAL | MMP8     | 1954.628  |
| CAR-HER2-BASAL | BMP8A    | 1881.6553 |
| CAR-HER2-BASAL | MAD2L1   | 1861.4773 |
| CAR-HER2-BASAL | GNA11    | 1848.366  |
| CAR-HER2-BASAL | SLC29A1  | 1824.762  |
| CAR-HER2-BASAL | TFRC     | 1751.1133 |
| CAR-HER2-BASAL | BCAM     | 1723.7268 |
| CAR-HER2-BASAL | IL1RN    | 1690.3527 |
| CAR-HER2-BASAL | RRM2     | 1674.338  |
| CAR-HER2-BASAL | ELAC2    | 1547.6533 |
| CAR-HER2-BASAL | APOBEC3B | 1427.5722 |
| CAR-HER2-BASAL | SH3BP2   | 1283.2313 |
| CAR-HER2-BASAL | GLT8D1   | 1251.0095 |
| CAR-HER2-BASAL | UBE2S    | 1221.1867 |
| CAR-HER2-BASAL | LIMD2    | 1198.6467 |
| CAR-HER2-BASAL | CDK2     | 1155.9033 |
| CAR-HER2-BASAL | DAG1     | 1152.1927 |
| CAR-HER2-BASAL | UCK2     | 1051.4233 |
| CAR-HER2-BASAL | DVL2     | 1013.2364 |
| CAR-HER2-BASAL | SNX30    | 879.2773  |
| CAR-HER2-BASAL | PRIM1    | 796.4766  |
| CAR-HER2-BASAL | CDK4     | 794.4113  |
| CAR-HER2-BASAL | MICU2    | 740.4212  |
| CAR-HER2-BASAL | TOP2A    | 724.2973  |
| CAR-HER2-BASAL | ASXL2    | 696.7595  |
| CAR-HER2-BASAL | ANKH     | 644.91    |
| CAR-HER2-BASAL | BNIP3L   | 558.4095  |
| CAR-HER2-BASAL | ARL2BP   | 540.122   |
| CAR-HER2-BASAL | ADGRL2   | 526.8707  |
| CAR-HER2-BASAL | ZFYVE1   | 504.0391  |
| CAR-HER2-BASAL | CEMIP    | 431.8659  |
| CAR-HER2-BASAL | PRIM2    | 419.7354  |
| CAR-HER2-BASAL | PANX1    | 408.9973  |
| CAR-HER2-BASAL | SLC2A5   | 361.5299  |
| CAR-HER2-BASAL | PPP2R5B  | 322.558   |
| CAR-HER2-BASAL | CYSLTR1  | 269.7705  |
| CAR-HER2-BASAL | THTPA    | 198.382   |
| CAR-HER2-BASAL | TMEM87A  | 172.6773  |
| CAR-HER2-BASAL | MGMT     | 155.8947  |
| CAR-HER2-BASAL | SLC7A1   | 146.7043  |
| CAR-HER2-BASAL | NCOA7    | 130.4969  |
| CAR-HER2-BASAL | PRKCI    | 41.4442   |

|                       |          |              |
|-----------------------|----------|--------------|
| CAR-HER2-BASAL        | PBK      | 32.028       |
| CAR-HER2-BASAL        | ASF1B    | 25.4087      |
| CAR-HER2-BASAL        | SLC7A6OS | 10.1267      |
| CAR-HER2-IFN $\gamma$ | WARS1    | 1107773.8667 |
| CAR-HER2-IFN $\gamma$ | HLA-DRA  | 333558.8618  |
| CAR-HER2-IFN $\gamma$ | IFIT2    | 324652.7608  |
| CAR-HER2-IFN $\gamma$ | STAT1    | 297194.6533  |
| CAR-HER2-IFN $\gamma$ | GBP1     | 268759.714   |
| CAR-HER2-IFN $\gamma$ | S100A8   | 243830.98    |
| CAR-HER2-IFN $\gamma$ | TAP1     | 232139.8933  |
| CAR-HER2-IFN $\gamma$ | HLA-C    | 207795.3333  |
| CAR-HER2-IFN $\gamma$ | LAP3     | 197713.5333  |
| CAR-HER2-IFN $\gamma$ | TYMP     | 195156.82    |
| CAR-HER2-IFN $\gamma$ | HLA-E    | 185783.0667  |
| CAR-HER2-IFN $\gamma$ | HLA-A    | 172498.0667  |
| CAR-HER2-IFN $\gamma$ | HLA-DRB1 | 167971.0904  |
| CAR-HER2-IFN $\gamma$ | ICAM1    | 157618.02    |
| CAR-HER2-IFN $\gamma$ | TAPBP    | 144708.0     |
| CAR-HER2-IFN $\gamma$ | GBP2     | 130140.706   |
| CAR-HER2-IFN $\gamma$ | LCP2     | 100493.3333  |
| CAR-HER2-IFN $\gamma$ | GBP4     | 95844.3779   |
| CAR-HER2-IFN $\gamma$ | IFIT3    | 94662.2267   |
| CAR-HER2-IFN $\gamma$ | MX1      | 90291.82     |
| CAR-HER2-IFN $\gamma$ | PLEK     | 81591.0267   |
| CAR-HER2-IFN $\gamma$ | S100A9   | 79925.88     |
| CAR-HER2-IFN $\gamma$ | PARP14   | 73611.0071   |
| CAR-HER2-IFN $\gamma$ | A2M      | 67650.12     |
| CAR-HER2-IFN $\gamma$ | SLAMF8   | 66664.04     |
| CAR-HER2-IFN $\gamma$ | GLUL     | 66552.2667   |
| CAR-HER2-IFN $\gamma$ | CTSL     | 65817.46     |
| CAR-HER2-IFN $\gamma$ | ISG15    | 65806.3533   |
| CAR-HER2-IFN $\gamma$ | HLA-B    | 65102.12     |
| CAR-HER2-IFN $\gamma$ | IFITM3   | 61124.9      |
| CAR-HER2-IFN $\gamma$ | NCF2     | 59560.3133   |
| CAR-HER2-IFN $\gamma$ | IFI16    | 56917.9733   |
| CAR-HER2-IFN $\gamma$ | LGALS9   | 53826.6      |
| CAR-HER2-IFN $\gamma$ | NCF1     | 52131.46     |
| CAR-HER2-IFN $\gamma$ | CD74     | 50747.6327   |
| CAR-HER2-IFN $\gamma$ | IL1B     | 50116.6133   |
| CAR-HER2-IFN $\gamma$ | MVP      | 47625.6      |
| CAR-HER2-IFN $\gamma$ | PARP9    | 45594.0811   |
| CAR-HER2-IFN $\gamma$ | SAMD9L   | 44749.2363   |
| CAR-HER2-IFN $\gamma$ | FCGR1A   | 43848.2287   |
| CAR-HER2-IFN $\gamma$ | TRPC4AP  | 42715.0006   |

|                       |             |            |
|-----------------------|-------------|------------|
| CAR-HER2-IFN $\gamma$ | UBE2L6      | 41988.74   |
| CAR-HER2-IFN $\gamma$ | GK          | 40962.3333 |
| CAR-HER2-IFN $\gamma$ | MTHFD2      | 39411.9933 |
| CAR-HER2-IFN $\gamma$ | APOL2       | 38873.6    |
| CAR-HER2-IFN $\gamma$ | CTSZ        | 37987.7667 |
| CAR-HER2-IFN $\gamma$ | OAS1        | 37050.7127 |
| CAR-HER2-IFN $\gamma$ | CD14        | 36109.9467 |
| CAR-HER2-IFN $\gamma$ | PLSCR1      | 34982.1267 |
| CAR-HER2-IFN $\gamma$ | RNF213      | 33657.3644 |
| CAR-HER2-IFN $\gamma$ | RIGI        | 32196.4267 |
| CAR-HER2-IFN $\gamma$ | SKAP2       | 31502.493  |
| CAR-HER2-IFN $\gamma$ | ITGB7       | 30586.5067 |
| CAR-HER2-IFN $\gamma$ | RALA        | 30480.9667 |
| CAR-HER2-IFN $\gamma$ | MOB1A;MOB1B | 29904.54   |
| CAR-HER2-IFN $\gamma$ | DTX3L       | 28476.285  |
| CAR-HER2-IFN $\gamma$ | ADGRE5      | 26371.1533 |
| CAR-HER2-IFN $\gamma$ | DNAJA1      | 26157.02   |
| CAR-HER2-IFN $\gamma$ | NAMPT       | 24757.0067 |
| CAR-HER2-IFN $\gamma$ | ACSL1       | 24536.7533 |
| CAR-HER2-IFN $\gamma$ | CASP1       | 23200.42   |
| CAR-HER2-IFN $\gamma$ | CYBB        | 22619.1    |
| CAR-HER2-IFN $\gamma$ | XRN1        | 21412.806  |
| CAR-HER2-IFN $\gamma$ | IFIT1       | 21203.4153 |
| CAR-HER2-IFN $\gamma$ | STAT2       | 20931.04   |
| CAR-HER2-IFN $\gamma$ | PTPRC       | 20866.76   |
| CAR-HER2-IFN $\gamma$ | TDO2        | 19500.4573 |
| CAR-HER2-IFN $\gamma$ | LGALS3BP    | 19071.7067 |
| CAR-HER2-IFN $\gamma$ | TRIM21      | 19044.2067 |
| CAR-HER2-IFN $\gamma$ | ISG20       | 18521.944  |
| CAR-HER2-IFN $\gamma$ | IFIT5       | 18494.835  |
| CAR-HER2-IFN $\gamma$ | B2M         | 17861.1067 |
| CAR-HER2-IFN $\gamma$ | TNFAIP2     | 17235.8952 |
| CAR-HER2-IFN $\gamma$ | TTC39C      | 17154.3333 |
| CAR-HER2-IFN $\gamma$ | PML         | 16756.8533 |
| CAR-HER2-IFN $\gamma$ | NUB1        | 16620.1547 |
| CAR-HER2-IFN $\gamma$ | TLR2        | 15758.52   |
| CAR-HER2-IFN $\gamma$ | TRAFF1      | 15620.5523 |
| CAR-HER2-IFN $\gamma$ | IFIH1       | 15422.4069 |
| CAR-HER2-IFN $\gamma$ | SRC         | 14344.0    |
| CAR-HER2-IFN $\gamma$ | PARP10      | 13997.4347 |
| CAR-HER2-IFN $\gamma$ | CCR1        | 13794.2164 |
| CAR-HER2-IFN $\gamma$ | LPCAT2      | 13753.3667 |
| CAR-HER2-IFN $\gamma$ | CMPK2       | 13604.3533 |
| CAR-HER2-IFN $\gamma$ | SH2B2       | 13481.0729 |

|                       |          |            |
|-----------------------|----------|------------|
| CAR-HER2-IFN $\gamma$ | GSDMD    | 13374.0533 |
| CAR-HER2-IFN $\gamma$ | APOBEC3G | 12849.122  |
| CAR-HER2-IFN $\gamma$ | MYOF     | 12718.9333 |
| CAR-HER2-IFN $\gamma$ | IRF5     | 11788.124  |
| CAR-HER2-IFN $\gamma$ | RHBDF2   | 11752.1414 |
| CAR-HER2-IFN $\gamma$ | MSR1     | 11412.7767 |
| CAR-HER2-IFN $\gamma$ | CASP7    | 11202.1333 |
| CAR-HER2-IFN $\gamma$ | UBE2J1   | 11069.8933 |
| CAR-HER2-IFN $\gamma$ | HELZ2    | 10557.9318 |
| CAR-HER2-IFN $\gamma$ | OGFR     | 10476.1333 |
| CAR-HER2-IFN $\gamma$ | SNX6     | 10459.6267 |
| CAR-HER2-IFN $\gamma$ | KCNJ2    | 9969.5106  |
| CAR-HER2-IFN $\gamma$ | TXNIP    | 9950.6313  |
| CAR-HER2-IFN $\gamma$ | GPAT3    | 9639.6966  |
| CAR-HER2-IFN $\gamma$ | HMOX1    | 9518.4733  |
| CAR-HER2-IFN $\gamma$ | SLC2A3   | 9085.8313  |
| CAR-HER2-IFN $\gamma$ | NDRG1    | 8953.8467  |
| CAR-HER2-IFN $\gamma$ | GOLM1    | 8815.8873  |
| CAR-HER2-IFN $\gamma$ | CASP4    | 8054.6613  |
| CAR-HER2-IFN $\gamma$ | RNF181   | 7671.552   |
| CAR-HER2-IFN $\gamma$ | EVL      | 7534.1267  |
| CAR-HER2-IFN $\gamma$ | PRKCD    | 7305.2867  |
| CAR-HER2-IFN $\gamma$ | SP110    | 7235.8026  |
| CAR-HER2-IFN $\gamma$ | CD40     | 6969.6167  |
| CAR-HER2-IFN $\gamma$ | PARP12   | 6953.4874  |
| CAR-HER2-IFN $\gamma$ | IRF9     | 6877.8761  |
| CAR-HER2-IFN $\gamma$ | ALAS1    | 6754.5991  |
| CAR-HER2-IFN $\gamma$ | ADAM28   | 6752.62    |
| CAR-HER2-IFN $\gamma$ | THEMIS2  | 6636.8867  |
| CAR-HER2-IFN $\gamma$ | SDS      | 6533.4113  |
| CAR-HER2-IFN $\gamma$ | FBXO6    | 6527.5233  |
| CAR-HER2-IFN $\gamma$ | MLKL     | 6131.8825  |
| CAR-HER2-IFN $\gamma$ | MARCKS   | 6119.5327  |
| CAR-HER2-IFN $\gamma$ | RIPK2    | 6112.0713  |
| CAR-HER2-IFN $\gamma$ | CYLD     | 6082.2971  |
| CAR-HER2-IFN $\gamma$ | XIRP1    | 5973.0148  |
| CAR-HER2-IFN $\gamma$ | ARFGAP3  | 5963.9733  |
| CAR-HER2-IFN $\gamma$ | GTPBP1   | 5953.4467  |
| CAR-HER2-IFN $\gamma$ | DVL2     | 5665.8046  |
| CAR-HER2-IFN $\gamma$ | PPP1R12A | 5631.9     |
| CAR-HER2-IFN $\gamma$ | FYB1     | 5503.1164  |
| CAR-HER2-IFN $\gamma$ | ARHGEF11 | 5446.9153  |
| CAR-HER2-IFN $\gamma$ | SLFN5    | 5384.7209  |
| CAR-HER2-IFN $\gamma$ | FBXO7    | 5207.4041  |

|                       |          |           |
|-----------------------|----------|-----------|
| CAR-HER2-IFN $\gamma$ | PLA2G4A  | 5121.4304 |
| CAR-HER2-IFN $\gamma$ | CASP10   | 5070.34   |
| CAR-HER2-IFN $\gamma$ | PRPS2    | 4991.54   |
| CAR-HER2-IFN $\gamma$ | PAK1     | 4986.44   |
| CAR-HER2-IFN $\gamma$ | SP100    | 4954.632  |
| CAR-HER2-IFN $\gamma$ | TTC39B   | 4878.465  |
| CAR-HER2-IFN $\gamma$ | NADK     | 4722.9807 |
| CAR-HER2-IFN $\gamma$ | SLC30A1  | 4671.8427 |
| CAR-HER2-IFN $\gamma$ | ACTN4    | 3827.3333 |
| CAR-HER2-IFN $\gamma$ | BTN3A3   | 3668.6833 |
| CAR-HER2-IFN $\gamma$ | VRK2     | 3649.1923 |
| CAR-HER2-IFN $\gamma$ | STX11    | 3638.5758 |
| CAR-HER2-IFN $\gamma$ | DAPP1    | 3636.0773 |
| CAR-HER2-IFN $\gamma$ | RNF149   | 3622.558  |
| CAR-HER2-IFN $\gamma$ | XPNPEP1  | 3621.3    |
| CAR-HER2-IFN $\gamma$ | OASL     | 3518.4475 |
| CAR-HER2-IFN $\gamma$ | ENDOD1   | 3254.464  |
| CAR-HER2-IFN $\gamma$ | MICU2    | 3049.2109 |
| CAR-HER2-IFN $\gamma$ | RBCK1    | 2902.6462 |
| CAR-HER2-IFN $\gamma$ | CBR3     | 2893.0133 |
| CAR-HER2-IFN $\gamma$ | TAPBPL   | 2867.708  |
| CAR-HER2-IFN $\gamma$ | SLC35F6  | 2795.2185 |
| CAR-HER2-IFN $\gamma$ | IL1RN    | 2750.5127 |
| CAR-HER2-IFN $\gamma$ | OGFRL1   | 2641.3573 |
| CAR-HER2-IFN $\gamma$ | BCAR1    | 2622.0867 |
| CAR-HER2-IFN $\gamma$ | EML4     | 2603.1467 |
| CAR-HER2-IFN $\gamma$ | FAT1     | 2598.228  |
| CAR-HER2-IFN $\gamma$ | CCND3    | 2548.2005 |
| CAR-HER2-IFN $\gamma$ | PRKCI    | 2544.6202 |
| CAR-HER2-IFN $\gamma$ | RAB43    | 2408.3268 |
| CAR-HER2-IFN $\gamma$ | CPSF4    | 2402.1639 |
| CAR-HER2-IFN $\gamma$ | SLC2A5   | 2395.6419 |
| CAR-HER2-IFN $\gamma$ | CALCOCO2 | 2372.9767 |
| CAR-HER2-IFN $\gamma$ | GPT2     | 2317.308  |
| CAR-HER2-IFN $\gamma$ | MMAA     | 2305.078  |
| CAR-HER2-IFN $\gamma$ | PANX1    | 2173.2053 |
| CAR-HER2-IFN $\gamma$ | PRKCH    | 2042.1707 |
| CAR-HER2-IFN $\gamma$ | RASSF4   | 1898.3208 |
| CAR-HER2-IFN $\gamma$ | AGT      | 1889.4699 |
| CAR-HER2-IFN $\gamma$ | STAT3    | 1676.3761 |
| CAR-HER2-IFN $\gamma$ | PLEKHG2  | 1667.9219 |
| CAR-HER2-IFN $\gamma$ | TANGO6   | 1648.1637 |
| CAR-HER2-IFN $\gamma$ | SZT2     | 1635.7644 |
| CAR-HER2-IFN $\gamma$ | NCOA7    | 1585.803  |

|                               |         |              |
|-------------------------------|---------|--------------|
| CAR-HER2-IFN $\gamma$         | HCK     | 1574.8573    |
| CAR-HER2-IFN $\gamma$         | TRIM4   | 1495.4361    |
| CAR-HER2-IFN $\gamma$         | ARID3A  | 1407.2227    |
| CAR-HER2-IFN $\gamma$         | FAM8A1  | 1373.11      |
| CAR-HER2-IFN $\gamma$         | SNX8    | 1322.8187    |
| CAR-HER2-IFN $\gamma$         | THTPA   | 1320.982     |
| CAR-HER2-IFN $\gamma$         | LIPA    | 1294.86      |
| CAR-HER2-IFN $\gamma$         | PPP2R5B | 1284.8483    |
| CAR-HER2-IFN $\gamma$         | LIMD2   | 1238.5907    |
| CAR-HER2-IFN $\gamma$         | BTG1    | 1117.7933    |
| CAR-HER2-IFN $\gamma$         | ZFYVE1  | 1091.5644    |
| CAR-HER2-IFN $\gamma$         | TBC1D1  | 1040.7748    |
| CAR-HER2-IFN $\gamma$         | RNF121  | 906.3802     |
| CAR-HER2-IFN $\gamma$         | EPB41L3 | 902.808      |
| CAR-HER2-IFN $\gamma$         | SH3BP2  | 814.7513     |
| CAR-HER2-IFN $\gamma$         | GCA     | 727.2593     |
| CAR-HER2-IFN $\gamma$         | SEPTIN6 | 697.9467     |
| CAR-HER2-IFN $\gamma$         | HELZ    | 644.9276     |
| CAR-HER2-IFN $\gamma$         | MR1     | 632.1102     |
| CAR-HER2-IFN $\gamma$         | IL411   | 602.6133     |
| CAR-HER2-IFN $\gamma$         | LRRC58  | 581.9424     |
| CAR-HER2-IFN $\gamma$         | MTG1    | 431.0573     |
| CAR-HER2-IFN $\gamma$         | PRIM1   | 319.7889     |
| CAR-HER2-IFN $\gamma$         | SNX7    | 310.5291     |
| CAR-HER2-IFN $\gamma$         | PPFIBP2 | 226.4728     |
| CAR-HER2-IFN $\gamma$         | LRRC8C  | 223.9933     |
| CAR-HER2-IFN $\gamma$         | TMEM175 | 213.5818     |
| CAR-HER2-IFN $\gamma$         | ASXL2   | 111.2135     |
| CAR-HER2-IFN $\gamma$         | BNIP3L  | 90.3335      |
| CAR-HER2-IFN $\gamma$ -iTREM2 | WARS1   | 1718129.8667 |
| CAR-HER2-IFN $\gamma$ -iTREM2 | IFIT2   | 457762.7608  |
| CAR-HER2-IFN $\gamma$ -iTREM2 | HLA-DRA | 377480.4618  |
| CAR-HER2-IFN $\gamma$ -iTREM2 | LAP3    | 337045.9333  |
| CAR-HER2-IFN $\gamma$ -iTREM2 | HLA-A   | 297404.8667  |
| CAR-HER2-IFN $\gamma$ -iTREM2 | TYMP    | 291238.42    |
| CAR-HER2-IFN $\gamma$ -iTREM2 | STAT1   | 290357.8533  |
| CAR-HER2-IFN $\gamma$ -iTREM2 | S100A8  | 287972.58    |
| CAR-HER2-IFN $\gamma$ -iTREM2 | GBP1    | 282700.514   |
| CAR-HER2-IFN $\gamma$ -iTREM2 | HLA-E   | 278824.6667  |
| CAR-HER2-IFN $\gamma$ -iTREM2 | ICAM1   | 270469.62    |
| CAR-HER2-IFN $\gamma$ -iTREM2 | TAP1    | 216385.0933  |
| CAR-HER2-IFN $\gamma$ -iTREM2 | TAPBP   | 212202.4     |
| CAR-HER2-IFN $\gamma$ -iTREM2 | PLEK    | 191506.2267  |
| CAR-HER2-IFN $\gamma$ -iTREM2 | IFIT3   | 172832.6267  |

|                               |             |             |
|-------------------------------|-------------|-------------|
| CAR-HER2-IFN $\gamma$ -iTREM2 | HLA-C       | 168721.7333 |
| CAR-HER2-IFN $\gamma$ -iTREM2 | S100A9      | 162000.68   |
| CAR-HER2-IFN $\gamma$ -iTREM2 | HLA-DRB1    | 157849.0904 |
| CAR-HER2-IFN $\gamma$ -iTREM2 | LCP2        | 138864.9333 |
| CAR-HER2-IFN $\gamma$ -iTREM2 | GBP2        | 137896.306  |
| CAR-HER2-IFN $\gamma$ -iTREM2 | GLUL        | 111138.2667 |
| CAR-HER2-IFN $\gamma$ -iTREM2 | MX1         | 99758.62    |
| CAR-HER2-IFN $\gamma$ -iTREM2 | IL1B        | 97099.0133  |
| CAR-HER2-IFN $\gamma$ -iTREM2 | A2M         | 96972.12    |
| CAR-HER2-IFN $\gamma$ -iTREM2 | CTSL        | 96881.06    |
| CAR-HER2-IFN $\gamma$ -iTREM2 | GBP4        | 94640.5779  |
| CAR-HER2-IFN $\gamma$ -iTREM2 | HLA-B       | 86589.72    |
| CAR-HER2-IFN $\gamma$ -iTREM2 | ISG15       | 82759.1533  |
| CAR-HER2-IFN $\gamma$ -iTREM2 | NCF2        | 79241.1133  |
| CAR-HER2-IFN $\gamma$ -iTREM2 | MVP         | 75020.4     |
| CAR-HER2-IFN $\gamma$ -iTREM2 | NCF1        | 74445.86    |
| CAR-HER2-IFN $\gamma$ -iTREM2 | NAMPT       | 73850.2067  |
| CAR-HER2-IFN $\gamma$ -iTREM2 | MOB1A;MOB1B | 73064.14    |
| CAR-HER2-IFN $\gamma$ -iTREM2 | CTSZ        | 72551.3667  |
| CAR-HER2-IFN $\gamma$ -iTREM2 | SLAMF8      | 71216.84    |
| CAR-HER2-IFN $\gamma$ -iTREM2 | IFITM3      | 66848.66    |
| CAR-HER2-IFN $\gamma$ -iTREM2 | CD74        | 65821.2327  |
| CAR-HER2-IFN $\gamma$ -iTREM2 | PLSCR1      | 64764.3667  |
| CAR-HER2-IFN $\gamma$ -iTREM2 | LGALS9      | 61810.2     |
| CAR-HER2-IFN $\gamma$ -iTREM2 | FCGR1A      | 59134.1087  |
| CAR-HER2-IFN $\gamma$ -iTREM2 | APOL2       | 58793.92    |
| CAR-HER2-IFN $\gamma$ -iTREM2 | ARL8A       | 55460.2     |
| CAR-HER2-IFN $\gamma$ -iTREM2 | IFI16       | 54614.8533  |
| CAR-HER2-IFN $\gamma$ -iTREM2 | UBE2L6      | 54360.54    |
| CAR-HER2-IFN $\gamma$ -iTREM2 | OAS1        | 53259.7527  |
| CAR-HER2-IFN $\gamma$ -iTREM2 | GK          | 52662.4133  |
| CAR-HER2-IFN $\gamma$ -iTREM2 | MTHFD2      | 52478.9533  |
| CAR-HER2-IFN $\gamma$ -iTREM2 | CD14        | 49749.0667  |
| CAR-HER2-IFN $\gamma$ -iTREM2 | ITGB7       | 48569.4667  |
| CAR-HER2-IFN $\gamma$ -iTREM2 | SRC         | 44807.6     |
| CAR-HER2-IFN $\gamma$ -iTREM2 | ADGRE5      | 44300.9933  |
| CAR-HER2-IFN $\gamma$ -iTREM2 | RALA        | 43906.8467  |
| CAR-HER2-IFN $\gamma$ -iTREM2 | PTPRC       | 43195.48    |
| CAR-HER2-IFN $\gamma$ -iTREM2 | B2M         | 38825.8267  |
| CAR-HER2-IFN $\gamma$ -iTREM2 | FKBP2       | 36870.0933  |
| CAR-HER2-IFN $\gamma$ -iTREM2 | PARP14      | 35862.3271  |
| CAR-HER2-IFN $\gamma$ -iTREM2 | CYBB        | 34202.86    |
| CAR-HER2-IFN $\gamma$ -iTREM2 | CASP1       | 32511.58    |
| CAR-HER2-IFN $\gamma$ -iTREM2 | CASP7       | 30719.8933  |

|                               |          |            |
|-------------------------------|----------|------------|
| CAR-HER2-IFN $\gamma$ -iTREM2 | ACSL1    | 30668.3933 |
| CAR-HER2-IFN $\gamma$ -iTREM2 | SKAP2    | 29482.973  |
| CAR-HER2-IFN $\gamma$ -iTREM2 | SAMD9L   | 29451.2363 |
| CAR-HER2-IFN $\gamma$ -iTREM2 | RIGI     | 29420.4267 |
| CAR-HER2-IFN $\gamma$ -iTREM2 | DNAJA1   | 27777.02   |
| CAR-HER2-IFN $\gamma$ -iTREM2 | EVL      | 26344.7267 |
| CAR-HER2-IFN $\gamma$ -iTREM2 | ISG20    | 26000.504  |
| CAR-HER2-IFN $\gamma$ -iTREM2 | TRIM21   | 25889.4067 |
| CAR-HER2-IFN $\gamma$ -iTREM2 | CMPK2    | 25714.9933 |
| CAR-HER2-IFN $\gamma$ -iTREM2 | LGALS3BP | 25317.1467 |
| CAR-HER2-IFN $\gamma$ -iTREM2 | TLR2     | 23147.96   |
| CAR-HER2-IFN $\gamma$ -iTREM2 | NDRG1    | 22805.9267 |
| CAR-HER2-IFN $\gamma$ -iTREM2 | PARP9    | 22204.4011 |
| CAR-HER2-IFN $\gamma$ -iTREM2 | LPCAT2   | 22000.7667 |
| CAR-HER2-IFN $\gamma$ -iTREM2 | PML      | 21565.1333 |
| CAR-HER2-IFN $\gamma$ -iTREM2 | MYOF     | 21468.4933 |
| CAR-HER2-IFN $\gamma$ -iTREM2 | PARP10   | 19940.3147 |
| CAR-HER2-IFN $\gamma$ -iTREM2 | APOBEC3G | 19537.122  |
| CAR-HER2-IFN $\gamma$ -iTREM2 | RNF181   | 19385.4288 |
| CAR-HER2-IFN $\gamma$ -iTREM2 | ACTN4    | 19131.3333 |
| CAR-HER2-IFN $\gamma$ -iTREM2 | RNF213   | 18828.1644 |
| CAR-HER2-IFN $\gamma$ -iTREM2 | IFIT5    | 18069.355  |
| CAR-HER2-IFN $\gamma$ -iTREM2 | STAT2    | 17059.68   |
| CAR-HER2-IFN $\gamma$ -iTREM2 | TTC39C   | 16877.0533 |
| CAR-HER2-IFN $\gamma$ -iTREM2 | TRPC4AP  | 16586.5206 |
| CAR-HER2-IFN $\gamma$ -iTREM2 | SNX6     | 16298.5067 |
| CAR-HER2-IFN $\gamma$ -iTREM2 | IFIT1    | 15695.3353 |
| CAR-HER2-IFN $\gamma$ -iTREM2 | IFIH1    | 15302.8469 |
| CAR-HER2-IFN $\gamma$ -iTREM2 | SLC2A3   | 15043.0313 |
| CAR-HER2-IFN $\gamma$ -iTREM2 | TRAFD1   | 14794.1523 |
| CAR-HER2-IFN $\gamma$ -iTREM2 | CD40     | 14616.6167 |
| CAR-HER2-IFN $\gamma$ -iTREM2 | GSDMD    | 14596.6533 |
| CAR-HER2-IFN $\gamma$ -iTREM2 | TNFAIP2  | 14364.2552 |
| CAR-HER2-IFN $\gamma$ -iTREM2 | MSR1     | 14143.2967 |
| CAR-HER2-IFN $\gamma$ -iTREM2 | NUB1     | 14079.2347 |
| CAR-HER2-IFN $\gamma$ -iTREM2 | IRF5     | 13996.164  |
| CAR-HER2-IFN $\gamma$ -iTREM2 | XRN1     | 13725.326  |
| CAR-HER2-IFN $\gamma$ -iTREM2 | CCR1     | 13393.6164 |
| CAR-HER2-IFN $\gamma$ -iTREM2 | TXNIP    | 13286.7513 |
| CAR-HER2-IFN $\gamma$ -iTREM2 | OGFR     | 12943.4933 |
| CAR-HER2-IFN $\gamma$ -iTREM2 | HELZ2    | 12677.5718 |
| CAR-HER2-IFN $\gamma$ -iTREM2 | ARFGAP3  | 12513.0933 |
| CAR-HER2-IFN $\gamma$ -iTREM2 | GOLM1    | 12501.7273 |
| CAR-HER2-IFN $\gamma$ -iTREM2 | DTX3L    | 12137.285  |

|                               |          |            |
|-------------------------------|----------|------------|
| CAR-HER2-IFN $\gamma$ -iTREM2 | UBE2J1   | 12058.2533 |
| CAR-HER2-IFN $\gamma$ -iTREM2 | THEMIS2  | 12031.8867 |
| CAR-HER2-IFN $\gamma$ -iTREM2 | KCNJ2    | 10836.1906 |
| CAR-HER2-IFN $\gamma$ -iTREM2 | BTG1     | 10563.4733 |
| CAR-HER2-IFN $\gamma$ -iTREM2 | PAK1     | 10264.56   |
| CAR-HER2-IFN $\gamma$ -iTREM2 | CASP4    | 10261.3013 |
| CAR-HER2-IFN $\gamma$ -iTREM2 | TDO2     | 9836.5373  |
| CAR-HER2-IFN $\gamma$ -iTREM2 | GTPBP1   | 9699.6067  |
| CAR-HER2-IFN $\gamma$ -iTREM2 | MARCKS   | 9617.6967  |
| CAR-HER2-IFN $\gamma$ -iTREM2 | IL1RN    | 8576.3527  |
| CAR-HER2-IFN $\gamma$ -iTREM2 | RHBDF2   | 8332.5814  |
| CAR-HER2-IFN $\gamma$ -iTREM2 | ADAM28   | 8322.42    |
| CAR-HER2-IFN $\gamma$ -iTREM2 | LIPA     | 7978.78    |
| CAR-HER2-IFN $\gamma$ -iTREM2 | SLC30A1  | 7844.4027  |
| CAR-HER2-IFN $\gamma$ -iTREM2 | FBXO6    | 7828.6833  |
| CAR-HER2-IFN $\gamma$ -iTREM2 | MLKL     | 7678.7305  |
| CAR-HER2-IFN $\gamma$ -iTREM2 | GCA      | 7645.1393  |
| CAR-HER2-IFN $\gamma$ -iTREM2 | PRKCD    | 7634.6067  |
| CAR-HER2-IFN $\gamma$ -iTREM2 | NADK     | 7593.3407  |
| CAR-HER2-IFN $\gamma$ -iTREM2 | CBR3     | 7569.3733  |
| CAR-HER2-IFN $\gamma$ -iTREM2 | FYB1     | 7551.8444  |
| CAR-HER2-IFN $\gamma$ -iTREM2 | IRF9     | 7478.6401  |
| CAR-HER2-IFN $\gamma$ -iTREM2 | PLA2G4A  | 7373.0304  |
| CAR-HER2-IFN $\gamma$ -iTREM2 | RIPK2    | 7265.5513  |
| CAR-HER2-IFN $\gamma$ -iTREM2 | PRPS2    | 7134.02    |
| CAR-HER2-IFN $\gamma$ -iTREM2 | PPP1R12A | 7029.06    |
| CAR-HER2-IFN $\gamma$ -iTREM2 | RNF149   | 6902.398   |
| CAR-HER2-IFN $\gamma$ -iTREM2 | XPNPEP1  | 6772.1     |
| CAR-HER2-IFN $\gamma$ -iTREM2 | XIRP1    | 6752.3748  |
| CAR-HER2-IFN $\gamma$ -iTREM2 | SDS      | 6625.6193  |
| CAR-HER2-IFN $\gamma$ -iTREM2 | CASP10   | 6568.256   |
| CAR-HER2-IFN $\gamma$ -iTREM2 | EML4     | 6397.5867  |
| CAR-HER2-IFN $\gamma$ -iTREM2 | TAPBPL   | 6240.068   |
| CAR-HER2-IFN $\gamma$ -iTREM2 | SP100    | 6184.792   |
| CAR-HER2-IFN $\gamma$ -iTREM2 | SH2B2    | 6171.5529  |
| CAR-HER2-IFN $\gamma$ -iTREM2 | HMOX1    | 5857.5933  |
| CAR-HER2-IFN $\gamma$ -iTREM2 | SEPTIN6  | 5662.7467  |
| CAR-HER2-IFN $\gamma$ -iTREM2 | CYLD     | 5365.2571  |
| CAR-HER2-IFN $\gamma$ -iTREM2 | OASL     | 5355.3155  |
| CAR-HER2-IFN $\gamma$ -iTREM2 | SP110    | 5354.8666  |
| CAR-HER2-IFN $\gamma$ -iTREM2 | OGFRL1   | 4944.3573  |
| CAR-HER2-IFN $\gamma$ -iTREM2 | BTN3A3   | 4897.2713  |
| CAR-HER2-IFN $\gamma$ -iTREM2 | BCAR1    | 4895.4067  |
| CAR-HER2-IFN $\gamma$ -iTREM2 | TTC39B   | 4844.025   |

|                               |                    |           |
|-------------------------------|--------------------|-----------|
| CAR-HER2-IFN $\gamma$ -iTREM2 | THTPA              | 4707.022  |
| CAR-HER2-IFN $\gamma$ -iTREM2 | IL4I1              | 4687.2933 |
| CAR-HER2-IFN $\gamma$ -iTREM2 | PANX1              | 4673.6453 |
| CAR-HER2-IFN $\gamma$ -iTREM2 | FBXO7              | 4650.4841 |
| CAR-HER2-IFN $\gamma$ -iTREM2 | ENDOD1             | 4561.244  |
| CAR-HER2-IFN $\gamma$ -iTREM2 | GPAT3              | 4437.4566 |
| CAR-HER2-IFN $\gamma$ -iTREM2 | FAT1               | 4416.34   |
| CAR-HER2-IFN $\gamma$ -iTREM2 | STX11              | 4338.6438 |
| CAR-HER2-IFN $\gamma$ -iTREM2 | ARHGEF11           | 4261.1153 |
| CAR-HER2-IFN $\gamma$ -iTREM2 | DAPP1              | 4255.7413 |
| CAR-HER2-IFN $\gamma$ -iTREM2 | LRRC8C             | 4247.5133 |
| CAR-HER2-IFN $\gamma$ -iTREM2 | ALAS1              | 3721.2111 |
| CAR-HER2-IFN $\gamma$ -iTREM2 | GPT2               | 3518.592  |
| CAR-HER2-IFN $\gamma$ -iTREM2 | CALCOCO2           | 3490.1847 |
| CAR-HER2-IFN $\gamma$ -iTREM2 | SLFN5              | 3392.9569 |
| CAR-HER2-IFN $\gamma$ -iTREM2 | RBCK1              | 3103.0862 |
| CAR-HER2-IFN $\gamma$ -iTREM2 | AGT                | 2990.6219 |
| CAR-HER2-IFN $\gamma$ -iTREM2 | SUCLA2             | 2963.0    |
| CAR-HER2-IFN $\gamma$ -iTREM2 | DPYD               | 2912.3853 |
| CAR-HER2-IFN $\gamma$ -iTREM2 | ARID3A             | 2880.5387 |
| CAR-HER2-IFN $\gamma$ -iTREM2 | PARP12             | 2596.9074 |
| CAR-HER2-IFN $\gamma$ -iTREM2 | SLC35F6            | 2589.2025 |
| CAR-HER2-IFN $\gamma$ -iTREM2 | VRK2               | 2555.4603 |
| CAR-HER2-IFN $\gamma$ -iTREM2 | SLC2A5             | 2529.7459 |
| CAR-HER2-IFN $\gamma$ -iTREM2 | CPSF4              | 2445.3162 |
| CAR-HER2-IFN $\gamma$ -iTREM2 | HCK                | 2285.2813 |
| CAR-HER2-IFN $\gamma$ -iTREM2 | PPP2R5B            | 2154.5283 |
| CAR-HER2-IFN $\gamma$ -iTREM2 | RAB43              | 2096.4148 |
| CAR-HER2-IFN $\gamma$ -iTREM2 | BNIP3L             | 2089.1215 |
| CAR-HER2-IFN $\gamma$ -iTREM2 | MMAA               | 2044.574  |
| CAR-HER2-IFN $\gamma$ -iTREM2 | CCND3              | 1992.2405 |
| CAR-HER2-IFN $\gamma$ -iTREM2 | UBASH3B            | 1862.0415 |
| CAR-HER2-IFN $\gamma$ -iTREM2 | SH3BP2             | 1825.0833 |
| CAR-HER2-IFN $\gamma$ -iTREM2 | RASSF4             | 1595.8168 |
| CAR-HER2-IFN $\gamma$ -iTREM2 | BCL10              | 1551.0229 |
| CAR-HER2-IFN $\gamma$ -iTREM2 | PAPSS2             | 1439.98   |
| CAR-HER2-IFN $\gamma$ -iTREM2 | NCOA7              | 1390.439  |
| CAR-HER2-IFN $\gamma$ -iTREM2 | STAT3              | 1352.8201 |
| CAR-HER2-IFN $\gamma$ -iTREM2 | FAM8A1             | 1161.322  |
| CAR-HER2-IFN $\gamma$ -iTREM2 | SNX8               | 1143.2307 |
| CAR-HER2-IFN $\gamma$ -iTREM2 | MR1                | 1117.3542 |
| CAR-HER2-IFN $\gamma$ -iTREM2 | SLC7A6OS           | 1079.7307 |
| CAR-HER2-IFN $\gamma$ -iTREM2 | EPB41L3            | 963.344   |
| CAR-HER2-IFN $\gamma$ -iTREM2 | CNK3/IPCEF1;IPCEF1 | 957.18    |

|                               |          |             |
|-------------------------------|----------|-------------|
| CAR-HER2-IFN $\gamma$ -iTREM2 | RNF121   | 869.8429    |
| CAR-HER2-IFN $\gamma$ -iTREM2 | SNX7     | 814.6094    |
| CAR-HER2-IFN $\gamma$ -iTREM2 | EPB41L2  | 739.4733    |
| CAR-HER2-IFN $\gamma$ -iTREM2 | PLEKHG2  | 664.9419    |
| CAR-HER2-IFN $\gamma$ -iTREM2 | MBLAC2   | 624.0695    |
| CAR-HER2-IFN $\gamma$ -iTREM2 | MICU2    | 537.2509    |
| CAR-HER2-IFN $\gamma$ -iTREM2 | ZFYVE1   | 518.2488    |
| CAR-HER2-IFN $\gamma$ -iTREM2 | TBC1D1   | 428.2708    |
| CAR-HER2-IFN $\gamma$ -iTREM2 | TMEM175  | 353.6316    |
| CAR-HER2-IFN $\gamma$ -iTREM2 | NFIL3    | 250.6661    |
| CAR-HER2-IFN $\gamma$ -iTREM2 | LIMD2    | 240.2747    |
| CAR-HER2-IFN $\gamma$ -iTREM2 | LRRC58   | 232.7271    |
| CAR-HER2-IFN $\gamma$ -iTREM2 | P4HA2    | 130.2353    |
| CAR-HER2-IFN $\gamma$ -iTREM2 | FAM20B   | 127.1232    |
| CAR-HER2-IFN $\gamma$ -iTREM2 | PRKCH    | 89.4733     |
| CAR-HER2-IFN $\gamma$ -iTREM2 | HELZ     | 84.5276     |
| CAR-HER2-IFN $\gamma$ -iTREM2 | ADCY3    | 58.3526     |
| CAR-HER2-IL4-IL10             | TGM2     | 190329.8267 |
| CAR-HER2-IL4-IL10             | PLAU     | 88417.0333  |
| CAR-HER2-IL4-IL10             | F13A1    | 44607.6426  |
| CAR-HER2-IL4-IL10             | APBB1P   | 32707.96    |
| CAR-HER2-IL4-IL10             | SORT1    | 22213.0533  |
| CAR-HER2-IL4-IL10             | PPFIBP1  | 20090.0133  |
| CAR-HER2-IL4-IL10             | MGLL     | 19206.5667  |
| CAR-HER2-IL4-IL10             | PICALM   | 17722.9733  |
| CAR-HER2-IL4-IL10             | AP2A2    | 16511.8733  |
| CAR-HER2-IL4-IL10             | KPNA4    | 16479.8467  |
| CAR-HER2-IL4-IL10             | SYNJ2    | 15767.2449  |
| CAR-HER2-IL4-IL10             | HMOX1    | 15161.8733  |
| CAR-HER2-IL4-IL10             | MAPKAPK3 | 13910.7667  |
| CAR-HER2-IL4-IL10             | LIPA     | 12882.54    |
| CAR-HER2-IL4-IL10             | BTG1     | 11884.2733  |
| CAR-HER2-IL4-IL10             | MMP1     | 11753.616   |
| CAR-HER2-IL4-IL10             | COL6A2   | 11205.6547  |
| CAR-HER2-IL4-IL10             | ITGB3    | 11033.96    |
| CAR-HER2-IL4-IL10             | EPB41L2  | 10871.9133  |
| CAR-HER2-IL4-IL10             | TFRC     | 10611.1933  |
| CAR-HER2-IL4-IL10             | NCALD    | 9960.6573   |
| CAR-HER2-IL4-IL10             | SLC5A3   | 9842.7433   |
| CAR-HER2-IL4-IL10             | S100A9   | 9821.88     |
| CAR-HER2-IL4-IL10             | SLC20A1  | 9549.0267   |
| CAR-HER2-IL4-IL10             | PRKCA    | 8371.8103   |
| CAR-HER2-IL4-IL10             | SLC7A5   | 8042.9067   |
| CAR-HER2-IL4-IL10             | FN1      | 7348.8467   |

|                   |         |           |
|-------------------|---------|-----------|
| CAR-HER2-IL4-IL10 | QSOX1   | 7103.02   |
| CAR-HER2-IL4-IL10 | PAPSS2  | 6465.9    |
| CAR-HER2-IL4-IL10 | LIMA1   | 6408.9467 |
| CAR-HER2-IL4-IL10 | MGST3   | 6333.42   |
| CAR-HER2-IL4-IL10 | CD163   | 6092.3887 |
| CAR-HER2-IL4-IL10 | IL4I1   | 5986.9733 |
| CAR-HER2-IL4-IL10 | LPL     | 5862.9533 |
| CAR-HER2-IL4-IL10 | LRRC8C  | 5807.1933 |
| CAR-HER2-IL4-IL10 | TESC    | 5674.488  |
| CAR-HER2-IL4-IL10 | MCEMP1  | 5047.0401 |
| CAR-HER2-IL4-IL10 | UBE2J1  | 5011.9333 |
| CAR-HER2-IL4-IL10 | MMP12   | 4602.8935 |
| CAR-HER2-IL4-IL10 | CLUH    | 4064.04   |
| CAR-HER2-IL4-IL10 | TK1     | 3927.9533 |
| CAR-HER2-IL4-IL10 | PLA2G4A | 3824.6704 |
| CAR-HER2-IL4-IL10 | ANKH    | 3694.942  |
| CAR-HER2-IL4-IL10 | CD109   | 3350.54   |
| CAR-HER2-IL4-IL10 | P4HA2   | 3294.8153 |
| CAR-HER2-IL4-IL10 | PRAG1   | 3126.5168 |
| CAR-HER2-IL4-IL10 | FEN1    | 3090.2733 |
| CAR-HER2-IL4-IL10 | TMEM87A | 3050.8773 |
| CAR-HER2-IL4-IL10 | CTSL    | 3020.1    |
| CAR-HER2-IL4-IL10 | RRM1    | 2690.9533 |
| CAR-HER2-IL4-IL10 | PRKCH   | 2505.3142 |
| CAR-HER2-IL4-IL10 | CTNNB1  | 2442.2993 |
| CAR-HER2-IL4-IL10 | CDC20   | 2257.3813 |
| CAR-HER2-IL4-IL10 | UCK2    | 1749.9033 |
| CAR-HER2-IL4-IL10 | CYSLTR1 | 1601.2705 |
| CAR-HER2-IL4-IL10 | GCA     | 1597.0193 |
| CAR-HER2-IL4-IL10 | ADCY3   | 1520.0406 |
| CAR-HER2-IL4-IL10 | SLC7A1  | 1509.9963 |
| CAR-HER2-IL4-IL10 | BCL10   | 1476.8952 |
| CAR-HER2-IL4-IL10 | TACC3   | 1474.5273 |
| CAR-HER2-IL4-IL10 | BMP8A   | 1436.3393 |
| CAR-HER2-IL4-IL10 | MMP8    | 1406.132  |
| CAR-HER2-IL4-IL10 | NFIL3   | 1373.1101 |
| CAR-HER2-IL4-IL10 | EPB41L3 | 1361.628  |
| CAR-HER2-IL4-IL10 | ARL8A   | 1347.4    |
| CAR-HER2-IL4-IL10 | XPNPEP1 | 1339.06   |
| CAR-HER2-IL4-IL10 | FAM20B  | 1310.8967 |
| CAR-HER2-IL4-IL10 | DPYD    | 1276.7053 |
| CAR-HER2-IL4-IL10 | CEMIP   | 1256.174  |
| CAR-HER2-IL4-IL10 | SLC29A1 | 1234.966  |
| CAR-HER2-IL4-IL10 | DAG1    | 1174.8527 |

|                          |          |            |
|--------------------------|----------|------------|
| CAR-HER2-IL4-IL10        | CDK2     | 1126.4633  |
| CAR-HER2-IL4-IL10        | WDHD1    | 1102.8263  |
| CAR-HER2-IL4-IL10        | SLC7A6OS | 1084.7587  |
| CAR-HER2-IL4-IL10        | PBK      | 1078.26    |
| CAR-HER2-IL4-IL10        | SNX8     | 1009.0307  |
| CAR-HER2-IL4-IL10        | UBE2S    | 949.6107   |
| CAR-HER2-IL4-IL10        | MGMT     | 826.1187   |
| CAR-HER2-IL4-IL10        | TIMP3    | 813.6647   |
| CAR-HER2-IL4-IL10        | CDK4     | 805.1713   |
| CAR-HER2-IL4-IL10        | PPFIBP2  | 794.6808   |
| CAR-HER2-IL4-IL10        | CCND3    | 780.6805   |
| CAR-HER2-IL4-IL10        | ELAC2    | 679.2133   |
| CAR-HER2-IL4-IL10        | CCNB1    | 663.8295   |
| CAR-HER2-IL4-IL10        | KIF11    | 547.1433   |
| CAR-HER2-IL4-IL10        | ARL2BP   | 473.962    |
| CAR-HER2-IL4-IL10        | ADGRL2   | 443.7227   |
| CAR-HER2-IL4-IL10        | PRIM2    | 428.0557   |
| CAR-HER2-IL4-IL10        | DDB2     | 393.3963   |
| CAR-HER2-IL4-IL10        | SATB1    | 388.9204   |
| CAR-HER2-IL4-IL10        | ASF1B    | 388.2087   |
| CAR-HER2-IL4-IL10        | ITM2C    | 334.8292   |
| CAR-HER2-IL4-IL10        | ARID3A   | 280.1147   |
| CAR-HER2-IL4-IL10        | SPRY4    | 207.7013   |
| CAR-HER2-IL4-IL10        | HCK      | 200.2293   |
| CAR-HER2-IL4-IL10        | SNX30    | 178.4453   |
| CAR-HER2-IL4-IL10        | FKBP2    | 174.2533   |
| CAR-HER2-IL4-IL10        | NPM3     | 164.5047   |
| CAR-HER2-IL4-IL10        | MID1IP1  | 141.727    |
| CAR-HER2-IL4-IL10        | PRIM1    | 79.2096    |
| CAR-HER2-IL4-IL10        | DVL2     | 38.6079    |
| CAR-HER2-IL4-IL10-iTREM2 | TGM2     | 69001.8267 |
| CAR-HER2-IL4-IL10-iTREM2 | APBB1IP  | 54706.76   |
| CAR-HER2-IL4-IL10-iTREM2 | PLAU     | 48724.6333 |
| CAR-HER2-IL4-IL10-iTREM2 | PPFIBP1  | 31577.9733 |
| CAR-HER2-IL4-IL10-iTREM2 | F13A1    | 29758.1626 |
| CAR-HER2-IL4-IL10-iTREM2 | SYNJ2    | 26642.0449 |
| CAR-HER2-IL4-IL10-iTREM2 | PICALM   | 20352.0133 |
| CAR-HER2-IL4-IL10-iTREM2 | MMP1     | 17603.256  |
| CAR-HER2-IL4-IL10-iTREM2 | AP2A2    | 16074.2333 |
| CAR-HER2-IL4-IL10-iTREM2 | MGLL     | 13872.0467 |
| CAR-HER2-IL4-IL10-iTREM2 | TFRC     | 13172.0733 |
| CAR-HER2-IL4-IL10-iTREM2 | MAPKAPK3 | 12700.0067 |
| CAR-HER2-IL4-IL10-iTREM2 | KPNA4    | 12323.1667 |
| CAR-HER2-IL4-IL10-iTREM2 | PRKCA    | 11148.0103 |

|                          |         |            |
|--------------------------|---------|------------|
| CAR-HER2-IL4-IL10-iTREM2 | SORT1   | 10642.8133 |
| CAR-HER2-IL4-IL10-iTREM2 | MMP12   | 9875.8135  |
| CAR-HER2-IL4-IL10-iTREM2 | UBE2J1  | 9234.0533  |
| CAR-HER2-IL4-IL10-iTREM2 | SLC20A1 | 9101.7467  |
| CAR-HER2-IL4-IL10-iTREM2 | SLC5A3  | 9003.1033  |
| CAR-HER2-IL4-IL10-iTREM2 | LIMA1   | 7863.8267  |
| CAR-HER2-IL4-IL10-iTREM2 | QSOX1   | 5901.14    |
| CAR-HER2-IL4-IL10-iTREM2 | MCM3    | 5892.26    |
| CAR-HER2-IL4-IL10-iTREM2 | LPL     | 5789.9533  |
| CAR-HER2-IL4-IL10-iTREM2 | SLC7A5  | 5490.7067  |
| CAR-HER2-IL4-IL10-iTREM2 | CDC20   | 5385.8933  |
| CAR-HER2-IL4-IL10-iTREM2 | CLUH    | 5125.04    |
| CAR-HER2-IL4-IL10-iTREM2 | UCK2    | 4729.4233  |
| CAR-HER2-IL4-IL10-iTREM2 | PRAG1   | 4520.4368  |
| CAR-HER2-IL4-IL10-iTREM2 | ITGB3   | 4440.4     |
| CAR-HER2-IL4-IL10-iTREM2 | MGST3   | 4184.9     |
| CAR-HER2-IL4-IL10-iTREM2 | PRKCH   | 4078.5862  |
| CAR-HER2-IL4-IL10-iTREM2 | CTNNB1  | 3983.9393  |
| CAR-HER2-IL4-IL10-iTREM2 | LRRC8C  | 3870.9933  |
| CAR-HER2-IL4-IL10-iTREM2 | TESC    | 3697.224   |
| CAR-HER2-IL4-IL10-iTREM2 | COL6A2  | 3579.2547  |
| CAR-HER2-IL4-IL10-iTREM2 | EPB41L2 | 3530.1533  |
| CAR-HER2-IL4-IL10-iTREM2 | CCND3   | 3457.3205  |
| CAR-HER2-IL4-IL10-iTREM2 | BMP8A   | 3399.7393  |
| CAR-HER2-IL4-IL10-iTREM2 | LIPA    | 3290.06    |
| CAR-HER2-IL4-IL10-iTREM2 | SNX8    | 3226.2307  |
| CAR-HER2-IL4-IL10-iTREM2 | ADCY3   | 3171.8686  |
| CAR-HER2-IL4-IL10-iTREM2 | CDK4    | 2981.2113  |
| CAR-HER2-IL4-IL10-iTREM2 | NCALD   | 2913.4173  |
| CAR-HER2-IL4-IL10-iTREM2 | TIMP3   | 2704.6647  |
| CAR-HER2-IL4-IL10-iTREM2 | MCEMP1  | 2558.7201  |
| CAR-HER2-IL4-IL10-iTREM2 | TMEM87A | 2508.1573  |
| CAR-HER2-IL4-IL10-iTREM2 | ANKH    | 2475.238   |
| CAR-HER2-IL4-IL10-iTREM2 | PRKCD   | 2318.7667  |
| CAR-HER2-IL4-IL10-iTREM2 | NFIL3   | 2305.1941  |
| CAR-HER2-IL4-IL10-iTREM2 | CYSLTR1 | 2249.3105  |
| CAR-HER2-IL4-IL10-iTREM2 | ADGRL2  | 2029.2507  |
| CAR-HER2-IL4-IL10-iTREM2 | GLT8D1  | 1967.7099  |
| CAR-HER2-IL4-IL10-iTREM2 | SNX30   | 1955.4853  |
| CAR-HER2-IL4-IL10-iTREM2 | KIFC1   | 1905.7189  |
| CAR-HER2-IL4-IL10-iTREM2 | PAPSS2  | 1849.86    |
| CAR-HER2-IL4-IL10-iTREM2 | ARL2BP  | 1734.282   |
| CAR-HER2-IL4-IL10-iTREM2 | DIMT1   | 1727.14    |
| CAR-HER2-IL4-IL10-iTREM2 | TTC39B  | 1616.345   |

|                          |         |           |
|--------------------------|---------|-----------|
| CAR-HER2-IL4-IL10-iTREM2 | HMOX1   | 1581.0733 |
| CAR-HER2-IL4-IL10-iTREM2 | MMP8    | 1520.364  |
| CAR-HER2-IL4-IL10-iTREM2 | CDK2    | 1502.7833 |
| CAR-HER2-IL4-IL10-iTREM2 | UBE2S   | 1477.3627 |
| CAR-HER2-IL4-IL10-iTREM2 | P4HA2   | 1461.8953 |
| CAR-HER2-IL4-IL10-iTREM2 | FAM20B  | 1431.9367 |
| CAR-HER2-IL4-IL10-iTREM2 | PRKCI   | 1430.5829 |
| CAR-HER2-IL4-IL10-iTREM2 | MID1IP1 | 1393.827  |
| CAR-HER2-IL4-IL10-iTREM2 | GNA11   | 1324.6964 |
| CAR-HER2-IL4-IL10-iTREM2 | CPSF4   | 1277.344  |
| CAR-HER2-IL4-IL10-iTREM2 | POM121C | 1218.8237 |
| CAR-HER2-IL4-IL10-iTREM2 | UHRF1   | 1203.6767 |
| CAR-HER2-IL4-IL10-iTREM2 | TANGO6  | 1196.1717 |
| CAR-HER2-IL4-IL10-iTREM2 | TOP2A   | 1100.4493 |
| CAR-HER2-IL4-IL10-iTREM2 | SZT2    | 1085.492  |
| CAR-HER2-IL4-IL10-iTREM2 | HELZ    | 966.5676  |
| CAR-HER2-IL4-IL10-iTREM2 | SATB1   | 949.3884  |
| CAR-HER2-IL4-IL10-iTREM2 | EML4    | 947.3867  |
| CAR-HER2-IL4-IL10-iTREM2 | MTG1    | 878.4933  |
| CAR-HER2-IL4-IL10-iTREM2 | TYMS    | 791.6357  |
| CAR-HER2-IL4-IL10-iTREM2 | CEMIP   | 761.034   |
| CAR-HER2-IL4-IL10-iTREM2 | CLEC11A | 726.2993  |
| CAR-HER2-IL4-IL10-iTREM2 | DDB2    | 663.9243  |
| CAR-HER2-IL4-IL10-iTREM2 | PPFIBP2 | 657.2048  |
| CAR-HER2-IL4-IL10-iTREM2 | MGMT    | 598.7267  |
| CAR-HER2-IL4-IL10-iTREM2 | GPAT3   | 590.3366  |
| CAR-HER2-IL4-IL10-iTREM2 | PRIM2   | 569.2037  |
| CAR-HER2-IL4-IL10-iTREM2 | NT5DC1  | 551.728   |
| CAR-HER2-IL4-IL10-iTREM2 | ELAC2   | 499.9333  |
| CAR-HER2-IL4-IL10-iTREM2 | SLC35F6 | 476.6105  |
| CAR-HER2-IL4-IL10-iTREM2 | PBK     | 432.928   |
| CAR-HER2-IL4-IL10-iTREM2 | PLEKHG2 | 405.7739  |
| CAR-HER2-IL4-IL10-iTREM2 | TK1     | 356.4333  |
| CAR-HER2-IL4-IL10-iTREM2 | KANK2   | 316.3341  |
| CAR-HER2-IL4-IL10-iTREM2 | RRM2    | 314.218   |
| CAR-HER2-IL4-IL10-iTREM2 | LRRC58  | 297.7791  |
| CAR-HER2-IL4-IL10-iTREM2 | TMEM175 | 260.5284  |
| CAR-HER2-IL4-IL10-iTREM2 | RNF121  | 236.2682  |
| CAR-HER2-IL4-IL10-iTREM2 | IL4I1   | 215.2133  |
| CAR-HER2-IL4-IL10-iTREM2 | SLC7A1  | 197.6523  |
| CAR-HER2-IL4-IL10-iTREM2 | ZFYVE1  | 180.7968  |
| CAR-HER2-IL4-IL10-iTREM2 | TRIM4   | 151.1388  |
| CAR-HER2-IL4-IL10-iTREM2 | SNX7    | 145.7811  |
| CAR-HER2-IL4-IL10-iTREM2 | WDHD1   | 106.0103  |

|                          |                    |             |
|--------------------------|--------------------|-------------|
| CAR-HER2-IL4-IL10-ITREM2 | ASF1B              | 90.3287     |
| CAR-HER2-IL4-IL10-ITREM2 | DUSP4              | 43.1589     |
| CAR-HER2-IL4-IL10-ITREM2 | MICU2              | 34.6429     |
| CAR-HER2-IL4-IL10-ITREM2 | KIF11              | 26.5113     |
| CAR-HER2-IL4-IL10-ITREM2 | MMAA               | 22.102      |
| CAR-HER2-IL4-IL10-ITREM2 | SPRY4              | 6.0173      |
| CAR-HER2-IL4-IL10-ITREM2 | EPB41L3            | 1.908       |
| CAR-HER2-ITREM2          | ACTN4              | 122695.3333 |
| CAR-HER2-ITREM2          | HLA-A              | 55820.0667  |
| CAR-HER2-ITREM2          | TFRC               | 53448.4333  |
| CAR-HER2-ITREM2          | ILF2               | 38191.9333  |
| CAR-HER2-ITREM2          | TK1                | 37012.9133  |
| CAR-HER2-ITREM2          | MCM3               | 29737.26    |
| CAR-HER2-ITREM2          | CD109              | 22710.9     |
| CAR-HER2-ITREM2          | MGST3              | 18983.34    |
| CAR-HER2-ITREM2          | RRM2               | 15260.738   |
| CAR-HER2-ITREM2          | FEN1               | 11918.1533  |
| CAR-HER2-ITREM2          | GRWD1              | 11872.8     |
| CAR-HER2-ITREM2          | FN1                | 10997.6467  |
| CAR-HER2-ITREM2          | MKI67              | 10042.7927  |
| CAR-HER2-ITREM2          | TOP2A              | 9824.3973   |
| CAR-HER2-ITREM2          | RRM1               | 9639.1933   |
| CAR-HER2-ITREM2          | UHRF1              | 8630.8767   |
| CAR-HER2-ITREM2          | ARL8A              | 8328.2      |
| CAR-HER2-ITREM2          | ASF1B              | 8326.1687   |
| CAR-HER2-ITREM2          | CDC20              | 7494.9333   |
| CAR-HER2-ITREM2          | PDCD4              | 7212.3653   |
| CAR-HER2-ITREM2          | TACC3              | 6979.9753   |
| CAR-HER2-ITREM2          | LIG1               | 6648.9533   |
| CAR-HER2-ITREM2          | MAD2L1             | 6326.7973   |
| CAR-HER2-ITREM2          | KANK2              | 5794.9741   |
| CAR-HER2-ITREM2          | DUT                | 5603.71     |
| CAR-HER2-ITREM2          | CLUH               | 5353.0      |
| CAR-HER2-ITREM2          | KIF11              | 4917.7193   |
| CAR-HER2-ITREM2          | SUCLA2             | 4755.88     |
| CAR-HER2-ITREM2          | ARL2BP             | 4727.202    |
| CAR-HER2-ITREM2          | CDK2               | 4487.7033   |
| CAR-HER2-ITREM2          | TYMS               | 4354.9917   |
| CAR-HER2-ITREM2          | WDHD1              | 4140.7773   |
| CAR-HER2-ITREM2          | CNK3/IPCEF1;IPCEF1 | 4126.18     |
| CAR-HER2-ITREM2          | APOBEC3B           | 3914.8216   |
| CAR-HER2-ITREM2          | PLXNB2             | 3568.7933   |
| CAR-HER2-ITREM2          | CD14               | 3345.6667   |
| CAR-HER2-ITREM2          | DIMT1              | 3225.464    |

|                 |          |           |
|-----------------|----------|-----------|
| CAR-HER2-ITREM2 | SLC29A1  | 3058.17   |
| CAR-HER2-ITREM2 | UBE2S    | 3057.8707 |
| CAR-HER2-ITREM2 | KPNA4    | 3022.1667 |
| CAR-HER2-ITREM2 | UCK2     | 2973.7033 |
| CAR-HER2-ITREM2 | TIMP3    | 2971.5847 |
| CAR-HER2-ITREM2 | KIFC1    | 2962.5189 |
| CAR-HER2-ITREM2 | CCNB1    | 2755.7775 |
| CAR-HER2-ITREM2 | MBLAC2   | 2630.4975 |
| CAR-HER2-ITREM2 | CLEC11A  | 2519.0873 |
| CAR-HER2-ITREM2 | PBK      | 2360.736  |
| CAR-HER2-ITREM2 | CPSF4    | 2343.944  |
| CAR-HER2-ITREM2 | ITM2C    | 2319.1932 |
| CAR-HER2-ITREM2 | SP100    | 2099.472  |
| CAR-HER2-ITREM2 | NT5DC1   | 2033.592  |
| CAR-HER2-ITREM2 | SEPTIN6  | 1848.5067 |
| CAR-HER2-ITREM2 | SLC7A5   | 1794.3467 |
| CAR-HER2-ITREM2 | POM121C  | 1725.1267 |
| CAR-HER2-ITREM2 | CDK4     | 1604.7313 |
| CAR-HER2-ITREM2 | DDB2     | 1537.4483 |
| CAR-HER2-ITREM2 | QSOX1    | 1457.82   |
| CAR-HER2-ITREM2 | MGMT     | 1387.9947 |
| CAR-HER2-ITREM2 | ADGRL2   | 1191.6307 |
| CAR-HER2-ITREM2 | PRIM2    | 1092.3357 |
| CAR-HER2-ITREM2 | CALCOCO2 | 968.5287  |
| CAR-HER2-ITREM2 | DAG1     | 951.8287  |
| CAR-HER2-ITREM2 | ELAC2    | 948.2133  |
| CAR-HER2-ITREM2 | FAT1     | 947.116   |
| CAR-HER2-ITREM2 | ANKH     | 892.226   |
| CAR-HER2-ITREM2 | PRPS2    | 827.38    |
| CAR-HER2-ITREM2 | UBASH3B  | 824.8991  |
| CAR-HER2-ITREM2 | PRIM1    | 814.1256  |
| CAR-HER2-ITREM2 | SLC7A6OS | 781.7107  |
| CAR-HER2-ITREM2 | BNIP3L   | 767.4295  |
| CAR-HER2-ITREM2 | GNA11    | 672.0004  |
| CAR-HER2-ITREM2 | SLC7A1   | 642.0603  |
| CAR-HER2-ITREM2 | NPM3     | 563.1767  |
| CAR-HER2-ITREM2 | LIMD2    | 479.5307  |
| CAR-HER2-ITREM2 | STAT3    | 461.8961  |
| CAR-HER2-ITREM2 | SNX30    | 410.1653  |
| CAR-HER2-ITREM2 | TANGO6   | 392.1763  |
| CAR-HER2-ITREM2 | GLT8D1   | 386.7619  |
| CAR-HER2-ITREM2 | MR1      | 367.7854  |
| CAR-HER2-ITREM2 | HELZ     | 127.0516  |
| CAR-HER2-ITREM2 | BCL10    | 126.5692  |

|                 |        |         |
|-----------------|--------|---------|
| CAR-HER2-ITREM2 | BCAM   | 71.3748 |
| CAR-HER2-ITREM2 | CD163  | 67.8887 |
| CAR-HER2-ITREM2 | LRRC58 | 43.7511 |
